# 1 **A Multimodal Vision-text AI Copilot for Brain Disease Diagnosis and** 2 **Medical Imaging**

3 Guoxun Zhang<sup>1,2\*</sup>, Zebin Gao<sup>3\*</sup>, Caohui Duan<sup>4\*</sup>, Jiaxin Liu<sup>5</sup>, Yuerong Lizhu<sup>7,8</sup>, Yaou  
4 Liu<sup>7,8</sup>, Qian Chen<sup>7</sup>, Ling Wang<sup>7</sup>, Kailun Fei<sup>9</sup>, Tianyun Wang<sup>3</sup>, YuJia Chen<sup>5</sup>, Yanchen  
5 Guo<sup>5</sup>, Yuchen Guo<sup>2†</sup>, Xin Lou<sup>4†</sup>, & Qionghai Dai<sup>1,2,3†</sup>

6 *<sup>1</sup>Department of Automation, Tsinghua University, Beijing, 100084, China*

7 *<sup>2</sup>Institute for Brain and Cognitive Sciences, Tsinghua University, Beijing 100084, China*

8 *<sup>3</sup>School of Information Science and Technology, Fudan University, Shanghai 200438,*  
9 *China.*

10 *<sup>4</sup>Department of Radiology, Chinese PLA General Hospital, Beijing, China*

11 *<sup>5</sup>Tsinghua Shenzhen International Graduate School, Tsinghua University*

12 *<sup>6</sup>Being Friendship Hospital, Capital Medical University*

13 *<sup>7</sup>Department of Radiology, Beijing Tiantan Hospital, Capital Medical University, Beijing,*  
14 *100070, China*

15 *<sup>8</sup>Tiantan Image Research Center, China National Clinical Research Center for*  
16 *Neurological Diseases, Beijing, 100070, China*

17 *<sup>9</sup>Cancer Hospital, Chinese Academy of Medical Sciences and Peking Union Medical*  
18 *College*

19

20

21

22 *\*These authors contributed equally to this work*

23 *†Correspondence: qhdai@tsinghua.edu.cn (Q.D.), louxin@301hospital.com.cn (X.L.),*

24 *yuchen.w.guo@gmail.com (Y.G)*

## 25 **Abstract**

26 Integrating non-invasive brain imaging techniques, particularly computed tomography  
27 (CT) and magnetic resonance imaging (MRI), coupled with the advancement of artificial  
28 intelligence, is forging a key pathway for brain disease diagnosis, playing a vital role in  
29 safeguarding human health<sup>1-4</sup>. A robust artificial intelligence copilot is essential for  
30 clinical emergencies, functioning as the central processing unit for brain medical imaging  
31 systems, aiming to revolutionize the imaging process, expedite the diagnosis of diseases,  
32 and support treatment<sup>5-7</sup>. In this study, we developed an advanced multi-modal brain  
33 medical imaging foundational model named Brainfound, utilizing AI-generated content  
34 and image-text alignment technology, pre-trained on over 3 million brain CT images and  
35 over 7 million brain MRI images with their paired reports. As a clinical brain medical  
36 imaging multi-modal model, Brainfound achieved state of the art on seven downstream  
37 tasks, including brain disease diagnosis, brain lesion segmentation, MRI image  
38 enhancement, MRI cross-modality translation, automatic report generation, zero-shot  
39 brain disease classification, and free human-AI conversation. After thorough human-  
40 machine validation, Brainfound surpassed the current leading model by 51.75% in  
41 automatic report generation for brain imaging. In multiple-choice questions related to  
42 brain imaging, the accuracy of Brainfound outstripped GPT-4V by 47.68%, comparable  
43 to experienced doctors. We anticipate Brainfound, a clinical model with flexible visual  
44 and text input-output capabilities, will provide substantial support in brain medical  
45 imaging, clinical education, and human-in-the-loop medical diagnosis.

46

## 47 **Introduction**

48           Brain computed tomography (CT) and magnetic resonance imaging (MRI) have  
49 become essential non-invasive diagnostic tools in clinical scenarios. These imaging  
50 studies are critical for accurately diagnosing various brain conditions, including tumors,  
51 strokes, and neurodegenerative diseases<sup>8–11</sup>. CT is renowned for its rapid assessment  
52 capabilities, especially in acute settings, providing more reliable detection of hemorrhagic  
53 stroke. In contrast, MRI excels at producing high-resolution images of soft tissues,  
54 significantly increasing early detection rates for brain tumors and neurodegenerative  
55 changes. Collectively, these advancements highlight the significance of brain imaging in  
56 safeguarding patient health and facilitating timely medical interventions<sup>12–14</sup>.

57 Artificial intelligence (AI) plays a multifaceted role in augmenting the capabilities of  
58 brain CT and MRI<sup>15,16</sup>. AI technologies enable automated image analysis, rapidly  
59 identifying abnormalities such as lesions, tumors, and hemorrhages, thereby significantly  
60 enhancing diagnostic efficiency<sup>17–20</sup>. Deep learning models improve diagnostic accuracy  
61 by recognizing complex image features, sometimes matching or even surpassing the  
62 assessments of expert radiologists<sup>21,22</sup>. Additionally, AI supports clinical decision-  
63 making by integrating the clinical and imaging data of patients and providing  
64 personalized treatment recommendations<sup>23,24</sup>. Predictive analytics further enhance the  
65 early identification of high-risk patients and potential disease progression. Overall, AI  
66 optimizes resource allocation, ensuring that high-risk cases receive prompt and effective  
67 care. These advancements highlight the critical role of AI in improving diagnostic  
68 accuracy, clinical decision-making, and patient outcomes in neuroimaging<sup>25</sup>.

69 The challenges posed by limited labeled data and the complexities of acquiring multi-  
70 modal annotations significantly impact the development of AI models<sup>26</sup>. In medical  
71 imaging, the scarcity of high-quality labeled data hampers training efficacy, preventing  
72 models from achieving optimal performance<sup>27,28</sup>. The annotating of multi-modal data,

73 such as the combination of brain CT and MRI, necessitates advanced expertise, leading  
74 to increased time and costs associated with data preparation. This complexity not only  
75 heightens the risk of human error but also limits the diversity and richness of the training  
76 datasets, restricting the capacity of the model for generalization to unseen data.  
77 Additionally, the issue of data imbalance, where common conditions often overshadow  
78 rare diseases, exacerbates the risk of overfitting and diminishes overall model robustness.  
79 Addressing these challenges necessitates innovative methodologies, including semi-  
80 supervised and transfer learning approaches, to enhance model training and performance  
81 despite data limitations<sup>29,30</sup>. Such strategies are essential for ensuring that AI applications  
82 in clinical practice remain effective and reliable.

83 Large AI models have emerged as a promising solution to these challenges. Inspired  
84 by breakthroughs in large language and vision models like ChatGPT<sup>31,32</sup>, CLIP<sup>33</sup>,  
85 SimCLR<sup>34</sup>, and DINO<sup>35</sup>, medical foundational models are thriving and pushing the  
86 frontiers in computational pathology<sup>36</sup>, ophthalmic disease diagnosis<sup>37</sup>, ultrasonography<sup>38</sup>,  
87 and cancer biomarker innovation<sup>2</sup>. These advancements bolster diagnostic accuracy,  
88 facilitate knowledge sharing, and advance medical education<sup>39</sup>. By leveraging large-scale  
89 pre-training on diverse, unannotated datasets, foundation models capture robust feature  
90 representations, enabling effective performance even when labeled data is limited<sup>6,40</sup>.  
91 Their capability to integrate multimodal information further enhances their reliability in  
92 clinical applications. In addition, foundational models support advanced techniques such  
93 as self-supervised learning and generative models, which can synthesize annotated data,  
94 thereby expanding the training datasets and improving model generalization.  
95 Consequently, the introduction of foundation models not only provides innovative  
96 strategies for overcoming the challenges posed by the scarcity of annotated data and the  
97 integration of multimodal information but also opens new avenues for enhancing CT and  
98 MRI image analysis to identify brain diseases.



99 In this study, we introduce Brainfound, a multimodal AI copilot for brain medical  
100 imaging based on the AIGC and image-text alignment technology (Fig. 1), which has  
101 been pre-trained on BrainCT-3M and BrainMRI-7M (Supplementary Fig. 1,  
102 Supplementary Fig. 2) collected from the Chinese PLA General Hospital to achieve the  
103 aforementioned purpose. BrainCT-3M is a massive brain CT scan dataset containing  
104 107,754 brain CT scans and corresponding diagnostic reports, totaling over 3 million  
105 images. BrainMRI-7M is a brain multi-sequence MRI scan dataset containing 68,653  
106 brain multi-sequence MRI scans and corresponding diagnostic reports, totaling over 7  
107 million images. By harnessing these two datasets, we pre-train image encoders and  
108 decoders based on the Denoising Diffusion Probabilistic Model (DDPM, Fig. 1b) strategy,  
109 as well as text decoders based on the LLaMa<sup>41</sup> framework (Fig. 1b). We aligned the visual  
110 module and language module of Brainfound, which comprehended brain medical imaging  
111 and knowledge during pre-training, empowering Brainfound to tackle diverse and flexible  
112 downstream tasks. In comparison with multimodal models like GPT-4V, Brainfound  
113 achieved the best performance across seven types of tasks, including brain disease  
114 diagnosis, brain lesion segmentation, MRI image enhancement, MRI cross-modality  
115 translation, automatic generation of reports from images, zero-shot brain disease  
116 classification, and free human-AI conversation. Especially in two tasks: one is in  
117 automatic report generation, where Brainfound scored about 50% higher than the current  
118 top model in human-machine evaluation; the other is in multiple-choice question  
119 answering, where Brainfound outperformed GPT-4V by 47.68% in accuracy, comparable  
120 to experienced doctors.

## 121 **Results**

### 122 **Brainfound serving as a multimodal AI copilot for brain medical imaging**

123 Large-scale datasets are essential for building robust AI models. We assembled a  
124 comprehensive national Brain medical imaging dataset, to our knowledge, this is the  
125 largest multimodal brain medical imaging dataset available, containing BrainCT-3M and

126 BrainMRI-7M collected from the Chinese PLA General Hospital. BrainCT-3M originates  
127 from a larger multicenter dataset, which catalogs 630,992 scans (enrolled between 2008  
128 and 2022, comprising 366,123 males and 264,869 females) ([Supplementary Fig. 1](#)). The  
129 dataset was refined based on image quality, specifically the level of signal-to-noise ratio  
130 (SNR) and the diagnostic details provided in the reports ([Methods](#)), resulting in 105,184  
131 CT scans (59,935 males and 45,249 females) and paired diagnostic reports. This refined  
132 dataset includes approximately 46,066 cases of normal individuals, 25,197 cases of  
133 ischemia, 20,798 cases of hemorrhage, 19,497 cases of fractures, and 3,282 cases of  
134 tumors. Additionally, we gathered 68,653 MRI scans and paired diagnostic reports,  
135 including 36,002 males and 32,651 females, with admission dates from 2018 to 2023,  
136 covering ages from 1 to 105 years ([Supplementary Fig. 2](#)). The BrainMRI-7M  
137 encompasses several primary modalities: T1-weighted imaging (T1WI), T2-weighted  
138 imaging (T2WI), Diffusion-weighted imaging (DWI, low-b-value and standard-b-value),  
139 Fluid attenuated inversion recovery (FLAIR), etc. We employed the GPT-4 API to  
140 automatically tokenize MRI reports, allowing us to count the image types and quantities  
141 involved in BrainMRI-7M. The statistical results revealed the top 10 most frequent terms:  
142 Ischemia 32,021 times, Softening Focus 6,574 times, Normal 4,273 times, Inflammation  
143 3,936 times, Cyst 3,565 times, Atherosclerosis 3,035 times, Senile Brain Changes 2,865  
144 times, Cerebral Infarction 2,751 times, Hemorrhage 1,934 times, Vascular Stenosis 1,498  
145 times ([Supplementary Fig. 2](#)). Meanwhile, we collected a wide range of data for  
146 downstream validation tasks. These include publicly available datasets and hospital-  
147 acquired data. The publicly available datasets include the RSNA Intracranial Hemorrhage  
148 Classification dataset<sup>42</sup> for validating classification tasks and the BraTS MRI<sup>8</sup> dataset for  
149 image quality enhancement. The hospital-acquired data consists of physician-annotated  
150 intracranial hemorrhage segmentation data, midline shift segmentation data, MCQ data,  
151 report generation data, zero-shot classification data from both internal and external  
152 centers, and MRI data for modality conversion.

153 In the training phase of the image encoder and decoder (Brainfound-v), we utilized  
154 a U-net architecture augmented by transformer blocks featuring cross-attention<sup>43</sup>  
155 mechanisms, comprising approximately 78 million trainable parameters ([Supplementary](#)  
156 [Fig. 3, Methods](#)). Paired clinical information, such as image modality, was randomly  
157 selected and encoded using BERT<sup>44</sup>, then integrated with corresponding brain images to  
158 serve as input for the primary network architecture of Brainfound-v. The self-supervised  
159 pre-training of Brainfound-v is anchored on the fundamental principles of  
160 DDPM<sup>45</sup>([Methods](#)). A two-dimensional Brain CT or MRI image, along with its basic  
161 information, is randomly selected from the BrainCT-3M and BrainMRI-7M datasets and  
162 subjected to data augmentation. In the course of forward propagation, Gaussian noise  
163 with a defined intensity is systematically introduced into the image. Upon reaching 1000  
164 iterations, this procedure culminates in the conversion of the image into pure noise ([Fig.](#)  
165 [1b, Supplementary Fig. 4a](#)). Throughout backward propagation, the neural network  
166 meticulously learns to perform denoising and reconstructs the clean image  
167 ([Supplementary Fig. 5](#)), thereby cultivating advanced representation learning capabilities  
168 ([Supplementary Fig. 6](#)). Modality information from brain CT or MRI images serves as  
169 guidance and is concurrently input into the model. To bolster the robustness of the main  
170 backbone network against this modality information, we randomly occlude portions or  
171 the entirety of it as input. In the process of report generation, we employed the text  
172 encoder and decoder of BERT (102 million trainable parameters) and initialized them  
173 with pre-trained weights, along with diagnostic reports to pre-train the text encoder and  
174 decoder ([Supplementary Fig. 7, Methods](#)). For the task of open conversation, we utilized  
175 a LLaMA-like model (8 billion parameters) and its weights for initialization, using Lora<sup>46</sup>  
176 for fine-tuning with our self-collected instruction datasets about brain medical imaging  
177 ([Supplementary Fig. 8, Methods](#)).

178 During the inference phase, we design task-specific adapters to fully harness the  
179 capabilities of Brainfound. For the cerebral hemorrhage classification task, a trainable

180 multilayer perceptron (MLP) is utilized to convert the final output features of the  
181 Brainfound image encoder into diagnostic labels ([Supplementary Fig. 4b, Methods](#)). In  
182 the segmentation tasks for cerebral hemorrhage and midline shift, a set of learnable MLP  
183 classifiers is employed to independently classify the intermediate features extracted by  
184 the image encoder-decoder ([Supplementary Fig. 4c, Methods](#)). For the modality transfer  
185 task, the diffusion model is fine-tuned using the image encoder-decoder with modality-  
186 conditioned images. In the denoising task, we develop a zero-shot learning denoising  
187 diffusion model based on the image encoder-decoder module. For contrastive learning, a  
188 set of aggregation modules is introduced to merge the features from the image encoder  
189 and achieve scan-level alignment with reports ([Supplementary Fig. 7, Methods](#)). Finally,  
190 in the construction of the AI assistant, the features extracted by the image encoder are  
191 transformed into tokens and integrated with text inputs into a LLaMa-like large language  
192 model for unified processing ([Supplementary Fig. 8, Methods](#)).

193

#### 194 **Brainfound performs precise diagnosis and localization of brain diseases**

195 As a potentially life-threatening condition, intracranial hemorrhage requires an  
196 accurate diagnosis for proper treatment. We compared the full parameter fine-tuning  
197 performance and only the tail MLP fine-tuning performance of Brainfound with other  
198 methods on the publicly available RSNA intracranial hemorrhage classification dataset.  
199 We used 222,218 images from the RSNA intracranial hemorrhage dataset, with half used  
200 for model training and the other half for model testing. We conducted four experiments.  
201 The first experiment involved full parameter fine-tuning of models with different amounts  
202 of training data to compare the accuracy of intracranial hemorrhage classification. We  
203 compared Brainfound, MAE pre-trained on natural images (MAE)<sup>47</sup>, MAE pre-trained  
204 on medical images (MAE pre-trained), and models pre-trained on RadImagenet<sup>48</sup>. The  
205 models underwent full fine-tuning using the entire training set (about 110,000 images)

206 and reduced portions of the training set (1/2, 1/4, 1/8, 1/16, and 1/32). Brainfound  
207 achieved the best AUC across all training data volumes (Fig. 2a). For instance, with fine-  
208 tuning on the 1/32 training set (Fig. 2b, Supplementary Fig. 9a), Brainfound achieved an  
209 AUC of 0.8739 (95% CI 0.8690-0.8769), with ResNet<sup>49</sup> in second place reaching an AUC  
210 of 0.8739 (95% CI 0.8690-0.8769). The second experiment focuses on fine-tuning just  
211 the tail MLP under varying training data volumes, with the pre-trained model serving as  
212 a feature extractor for brain CT images. Brainfound achieved the highest AUC across all  
213 training data volumes (Fig. 2c). For instance, with 1/32 of the training set (Fig. 2d,  
214 Supplementary Fig. 9b), Brainfound achieved an AUC of 0.7776 (95% CI 0.7731-0.7817),  
215 whereas ResNet, in second place, reached an AUC of 0.7267 (95% CI 0.7215-0.7317).  
216 In addition, we incorporated the state-of-the-art method from the RSNA Brain  
217 Hemorrhage Classification competition to demonstrate the plug-and-play performance of  
218 Brainfound as the foundation model. This method is based on an ensemble learning  
219 approach with three different backbones. During comparison, we replaced one of the  
220 backbones (Densenet121<sup>50</sup>) with Brainfound. In all experiments, models based on  
221 Brainfound achieved the highest AUC scores (Supplementary Fig. 9c-d).

222         The visual module of Brainfound is built upon DDPM, a robust image generation  
223 tool that effectively learns the prior knowledge needed for dense prediction. We evaluated  
224 this in brain hemorrhage segmentation and midline shift detection tasks. For the brain  
225 hemorrhage segmentation task, we gathered 2060 brain CT scans from the Chinese PLA  
226 General Hospital, with 220 cases in the training set (1397 images), 760 cases in the  
227 validation set (5440 images), and 1080 cases in the test set (7917 images). In the full  
228 parameter fine-tuning process for Brainfound and three other comparative methods, we  
229 established four groups of training data volumes, using 12.5%, 25%, 50%, and 100% of  
230 the training set data (Fig. 2e). In all segmentation tasks for intracerebral hemorrhages,  
231 Brainfound achieved the best performance (Fig. 2e). For example, when fine-tuning with  
232 only 12.5% of the training data, the Dice coefficient of Brainfound was 0.6671 (95% CI

233 0.6536-0.6805), surpassing the second-place InternImage by approximately 31.99%.  
234 Brainfound excels at segmenting small hemorrhages located near the skull (Fig. 2f). The  
235 shift in the brain midline is a reliable indicator of the severity of brain diseases. For the  
236 task of brain midline localization and segmentation, we collected data from 301 patients,  
237 including 12 cases in the training set (439 images), 50 cases in the validation set (1629  
238 images), and 239 cases in the test set (7743 images). In the experiment, we tested four  
239 different training data volumes: 12.5% training set (1 case, 72 images), 25% training set  
240 (3 cases, 138 images), 50% training set (6 cases, 236 images), and 100% training set (12  
241 cases, 439 images), to assess the performance of four models in few-shot learning (Fig.  
242 2g). In the comparison with MedSAM<sup>51</sup>, MAE, and InternImage<sup>52</sup>, Brainfound  
243 outperformed the other models, achieving the highest Dice coefficient (Fig. 2g). The best  
244 performance was observed with 12.5% of the training data, where Brainfound scored  
245 0.6848 (95% CI 0.6682-0.7014), exceeding the second-place model by 17.47% (Fig. 2g).  
246 With a pixel-level visual model, Brainfound delivers more accurate masks in brain  
247 midline segmentation (Fig. 2h). From the results of the saliency map analysis, it is evident  
248 that the attention of Brainfound effectively concentrated on the necessary hemorrhage  
249 area or midline region for the task (Supplementary Fig. 10-12).

## 250 **Brainfound boosts the imaging capability of brain medical equipment**

251 MRI is a fundamental tool in clinical neuroimaging applications. Unlike CT, MRI  
252 is non-invasive, non-ionizing, inherently quantitative, and multi-parametric. By utilizing  
253 strong magnetic fields and radiofrequency signals, MRI generates high-contrast images  
254 of soft tissues, which makes it particularly advantageous in detecting brain conditions  
255 such as tumors, inflammation, and vascular abnormalities. From the standpoint of the  
256 main magnetic field strength, MRI covers a range from low-field to high-field and even  
257 ultra-high-field. Low-field MRI (such as 0.3T) has the advantages of lower equipment  
258 and maintenance costs and higher patient comfort, but the acquired images have lower  
259 spatial resolution and image quality, with longer acquisition times<sup>53-55</sup>. High-field MRI

260 (such as 3T) provides higher signal-to-noise ratio (SNR) and spatial resolution with  
261 shorter scan times. However, it is expensive and has limited availability. 5T MRI is  
262 gradually entering clinical practice and is helping to solve many clinical problems by  
263 improving resolution<sup>56</sup>. From the standpoint of acquisition sequences, MRI allows for the  
264 acquisition of high-resolution brain images with different contrasts. For MRI imaging,  
265 reducing scanning time would greatly expand its clinical application scenarios. Along  
266 with the rapid development of AI-enhanced MRI imaging, current AI methods can both  
267 recover clear images from low signal-to-noise ratio MRI images taken with fast  
268 acquisition and enable virtual multi-modal MRI imaging through modality transformation.  
269 The visual module of Brainfound, based on DDPM, has an inherent advantage in pixel-  
270 level tasks, as we have validated its performance in zero-shot learning for MRI denoising  
271 and few-shot learning for modality translation.

272 We first utilized the publicly available 3T MRI high SNR image dataset: the Brain  
273 Tumor Segmentation (BraTS) Challenge 2023, randomly selecting 10 brain T1WI scans  
274 (a total of 1380 images) to construct a zero-shot learning test set. Different intensities of  
275 simulated Rician noise were added to the clear MRI images to produce six test sets with  
276 varying noise levels ([Methods](#)), with average image SNRs of 9.6808 dB, 11.7425 dB,  
277 14.7979 dB, 15.6190 dB, 16.5326 dB, and 17.5389 dB. We constructed a zero-shot  
278 learning iterative denoising architecture using Brainfound ([Supplementary Fig. 13](#),  
279 [Methods](#)) and compared it with pre-trained SCUnet<sup>57</sup>, Neighbor2neighbor<sup>58</sup> (Nei2nei),  
280 and Noise2self<sup>59</sup>. We assessed the quality of the enhanced images using PSNR, RMSE,  
281 SNR, and SSIM([Methods](#)), which are commonly used metrics in computer vision.  
282 Brainfound achieved optimal scores on all four metrics across six different noise levels  
283 in the test sets ([Fig. 3a-d](#)). For instance, when the average SNR of test images is 14.7979  
284 dB (95% CI 14.7171-14.8786 dB), the SNR of the images enhanced by Brainfound is  
285 19.7580 dB (95% CI 19.6456-19.8704 dB), surpassing the second-place SCUnet by 6.89%  
286 ([Fig. 3c](#)), whose enhanced image SNR is 18.4848 dB (95% CI 18.3855-18.5842 dB).



287 Brainfound manages to remove noise while retaining details ([Supplementary Fig. 14](#)).  
288 Moreover, we gathered paired MRI images with both high and low SNR from various  
289 sequences spanning low field (0.3T) to high field (5T) to assess the denoising capabilities  
290 of Brainfound. The 0.3T low-field MRI images were sourced from the M4Raw dataset,  
291 including T1WI (25 scans, 450 images), T2WI (25 scans, 450 images), and FLAIR (25  
292 scans, 450 images). The 5T ultra-high field MRI images were collected at Beijing  
293 Friendship Hospital, including T2WI (1 scan, 10 images) and T1WI (1 scan, 19 images),  
294 and 25 images were collected from a 5T MRI at Shanghai United Imaging as the external  
295 test set ([Methods](#)). Brainfound secured the best scores on almost all datasets and metrics  
296 ([Fig. 3e-h](#)). For instance, in terms of PSNR, Brainfound surpassed the second place by up  
297 to 5% ([Fig. 3e](#)). Detailed comparisons and case studies are available in the supplementary  
298 materials ([Supplementary Fig. 15-20](#)).

299 We then validated the ability of Brainfound in MRI image modality  
300 transformation on clinically common MRI sequences. We collected 182 cases of brain  
301 3T MRI scan data from the Chinese PLA General Hospital, including T1WI, T2WI,  
302 FLAIR, low-b-value DWI, and standard-b-value DWI modalities. We used AI methods  
303 to virtually generate images of the other four modalities from T1WI. We used 94 scans  
304 (2205 images) as the training set and 88 scans (1936 images) as the test set. We compared  
305 Brainfound with SynDiff<sup>60</sup>, ResViT<sup>61</sup>, pGAN<sup>62</sup>, and cGAN<sup>63</sup> in modality transformation,  
306 which covers the commonly used MRI modality transfer network structures and methods.  
307 We employed PSNR, RMSE, SNR, and SSIM to quantify the comparison of modality  
308 transformation results. Brainfound achieved the best results across four modality  
309 transformation tasks ([Fig. 3i-l](#)). In SNR comparisons ([Fig. 3k](#)), Brainfound showed  
310 improvements of 8.17% for T1WI to T2WI, 7.52% for T1WI to FLAIR, 12.23% for  
311 T1WI to standard-b-value DWI, and 11.17% for T1WI to low-b-value DWI over the  
312 second place. In PSNR comparisons ([Fig. 3i](#)), Brainfound showed improvements of 3.90%  
313 for T1WI to T2WI, 3.78% for T1WI to FLAIR, 4.17% for T1WI to standard-b-value DWI,



314 and 3.40% for T1WI to low-b-value DWI over the second place. The T1WI to T2WI  
315 modality transformation results show that the output of Brainfound more clearly  
316 generates lesion areas and highlights important structural regions (Fig. 3j). Additional  
317 examples of modality conversion are available in the supplementary materials  
318 (Supplementary Fig. 21-24).

### 319 **Brainfound autonomously drafts high-quality clinical reports**

320 Automatically generating brain imaging reports has the potential to improve the  
321 medical experience of patients and the work efficiency of radiologists. Based on the  
322 BrainCT-3M and BrainMRI-7M datasets, we pre-trained the text encoder and decoder  
323 using a strategy similar to Bidirectional Encoder Representations from Transformers  
324 (BERT). Then, we aligned the image encoder and text encoder using the Contrastive  
325 Language-Image Pre-Training (CLIP) strategy, thereby training strategy the capability of  
326 Brainfound for automatic report generation (Supplementary Fig. 7, Methods). For a  
327 comprehensive understanding of a brain CT or MRI scan, Brainfound processes an entire  
328 brain CT or MRI scan stack when drafting reports (Fig. 4a, Methods). The alignment of  
329 text encoders and image encoders also serves the significant purpose of enabling zero-  
330 shot classification of brain CT or MRI scans based on text tokens.

331 We first evaluated the capabilities of Brainfound with GPT-4V, RadFM<sup>64</sup>, and  
332 MiniGPT-Med<sup>65</sup> in terms of automatic report generation. The default prompt was utilized  
333 to generate brain CT reports in the final three methods (Supplementary Fig. 25). We  
334 collected 990 brain CT scans and their corresponding reports, authored by experienced  
335 clinicians, from the Chinese PLA General Hospital to serve as a test set for these four  
336 methods. Data for evaluation in this dataset is not included in the pretraining dataset. We  
337 employed commonly used natural language processing metrics to quantitatively evaluate  
338 the report quality generated by each method, including BLUE-1, BLUE-2, BLUE-3,  
339 ROUGE-L, METEOR, and Bert similarity. Brainfound secured the highest scores in all

340 metrics: for BLUE-1(Fig. 4c), Brainfound scored 0.5275 (95% CI 0.5144-0.5405),  
341 outperforming the second-place GPT-4V by 110.24%, which scored 0.2509 (95% CI  
342 0.2482-0.2537). In METEOR (Fig. 4f), Brainfound scored 0.3182 (95% CI 0.3098-  
343 0.3266), surpassing GPT-4V by 101.46%, which scored 0.1579 (95% CI 0.1563-0.1594).  
344 In Bert similarity (Fig. 4h), Brainfound scored 0.9258 (95% CI 0.9233-0.9283),  
345 exceeding MiniGPT-Med by 11.42%, which scored 0.8309 (95% CI 0.8284-0.8334).  
346 Similar trends are observed in the results of other metrics (Fig. 4d,f,h). A report for a  
347 normal brain CT, a report for an ischemic brain CT, and a report for a hemorrhagic brain  
348 CT are presented in the supplementary materials(Supplementary Fig. 26-28). In parallel,  
349 we randomly selected 33 cases from the results to form a test set and established a human  
350 evaluation framework to assess the accuracy of reports generated by four methods  
351 (Methods). Based on the 3D slicer, we developed a human scoring framework for report  
352 evaluation (Supplementary Fig. 29). Five radiologists from three different hospitals, with  
353 an average practice duration of 6.4 years (5, 3, 2, 5, and 17 years respectively),  
354 participated in scoring the reports. The reports were evaluated on nine aspects according  
355 to clinical guidelines: the overall impression and completeness of the report, the  
356 descriptions of lesions for count, localization, morphology, boundary, density, type, and  
357 normal structure. For the overall impression (Fig. 4i), Brainfound scored 3.9455 (95% CI  
358 3.9104-3.9805), surpassing the second-place GPT-4V by 51.75%, which scored 2.600  
359 (95% CI 2.4943-2.7057). For the lesion count (Fig. 4j), Brainfound scored 3.4848 (95%  
360 CI 3.3382-3.6315), surpassing the second-place GPT-4V by 51.75%, which scored  
361 1.5394 (95% CI 1.4118-1.667). For the lesion localization (Fig. 4k), Brainfound scored  
362 3.4788 (95% CI 3.3322-3.6254), surpassing the second-place MiniGPT-Med by 113.33%,  
363 which scored 1.6303 (95% CI 1.4595-1.8011). For the shape description (Fig. 4l),  
364 Brainfound scored 3.4788 (95% CI 3.2955-3.6621), surpassing the second-place GPT-  
365 4V by 118.91%, which scored 1.5879 (95% CI 1.4156-1.7601). Detailed scoring results  
366 are available in Supplementary Fig. 30. We also leveraged the understanding of medical

367 knowledge by current large language models, having GPT-4 and GPT-4o score the  
368 reports generated by the four methods like doctors. Reports written by experienced  
369 doctors were used as the reference standard for GPT-4 and GPT-4o scoring. GPT-4 and  
370 GPT-4o each scored three times, obtaining results close to human scores ([Supplementary](#)  
371 [Fig. 31-32](#)).

372         Once the image and text encoders are aligned, zero-shot classification tasks can  
373 be seamlessly accomplished using the tokens from the text encoder([Fig. 4b](#)). We  
374 developed internal and external test sets to evaluate the performance of Brainfound and  
375 RadImageNet in zero-shot brain CT classification tasks. The internal test set was gathered  
376 at the Chinese PLA General Hospital, containing 588 brain CT scans with corresponding  
377 diagnostic results, including 190 normal brain CTs, 71 cases of cerebral hemorrhage, 122  
378 cases of cerebral ischemia, 173 cases of skull fracture, and 32 cases of brain tumor. The  
379 external test set was collected in Brains Hospital of Hunan Province and contains 363  
380 brain CT scans with corresponding diagnostic results, including 92 normal brain CTs, 62  
381 cases of cerebral hemorrhage, 160 cases of cerebral ischemia, 24 cases of skull fracture,  
382 and 25 cases of brain tumor. Brainfound achieved the highest AUC scores for the  
383 classification of the five types of CT scans in both the internal and external test sets ([Fig.](#)  
384 [4m-q](#), [Supplementary Fig. 33](#)). In internal dataset testing, the AUC of Brainfound for  
385 normal brain CT is 0.9892, while RadImageNet is 0.9737, with a difference of 1.59%([Fig.](#)  
386 [4m](#)); for brain hemorrhage CT, the AUC of Brainfound is 0.9602, and RadImageNet is  
387 0.8354, with a difference of 14.94%([Fig. 4n](#)); for brain ischemia CT, the AUC of  
388 Brainfound is 0.9736, and RadImageNet is 0.8658, with a difference of 12.45%([Fig. 4o](#));  
389 for brain fracture CT, the AUC of Brainfound is 0.9664, and RadImageNet is 0.9071,  
390 with a difference of 6.54%([Fig. 4p](#)); for brain tumor CT, the AUC of Brainfound is 0.9627,  
391 and RadImageNet is 0.6977, with a difference of 37.98%([Fig. 4q](#)). We visualized the  
392 probability distributions of Brainfound for five labels in the brain ischemia and hemorrhage  
393 CT classification([Fig. 4m-n](#)), where it is evident that the image encoder and text encoder

394 assign higher confidence to the correct label token afterward. Additional visualization  
395 results are available in [Supplementary Fig. 34](#). In external dataset tests, the AUC  
396 difference between Brainfound and RadImageNet is more pronounced, with the AUC of  
397 Brainfound nearly twice that of RadImageNet ([Supplementary Fig. 33](#)). Through  
398 significance analysis, the attention of Brainfound is concentrated on the regions that  
399 determine the image category ([Supplementary Fig. 35](#)). The label probability  
400 visualizations for the external test set are shown in [Supplementary Fig. 33](#).

### 401 **Brainfound handles medical MCQs and free conversations**

402 Finally, as an AI copilot tailored for brain imaging clinical applications, we  
403 assessed the capability of Brainfound via more flexible and challenging tasks. By  
404 leveraging the image sequences and corresponding diagnostic reports from BrainCT-3M  
405 and BrainMRI-7M, in combination with the strong text understanding capabilities of the  
406 current large language model (GPT-4), we created an instruction dataset named  
407 BrainInstru-1M, which contains 1,003,732 cases ([Fig. 4a](#)). BrainInstru-1M includes  
408 multiple-choice questions (MCQs) or free conversations: for MCQs, each instruction data  
409 contains a brain CT or MRI sequence, the question stem and options, and the correct  
410 answer; for free conversations, each instruction data contains a brain CT or MRI sequence  
411 along with three rounds of conversations. We employed different prompts to guide GPT-  
412 4 in generating data from various knowledge depths and perspectives, enriching the data  
413 diversity of BrainInstru-1M.

414 To evaluate the performance of Brainfound in answering MCQ, we created a test  
415 set called BrainMCQ. BrainMCQ consists of 70 brain CT scan samples: 12 normal brain  
416 CTs, 14 brain hemorrhage CTs, 20 brain ischemia CTs, 12 brain fracture CTs, and 12  
417 brain tumor CTs ([Fig. 5d](#)). Each CT scan contains 3-4 MCQs, with a total of 229 MCQs,  
418 which include 3 three-option questions, 215 four-option questions, and 11 five-option  
419 questions ([Fig. 5e](#)). In terms of the options, we ensure the correct answer is randomly

420 distributed, with no bias towards any specific option (Fig. 5f). We recruited three  
421 experienced doctors from three different hospitals, with an average of 3.3 years of  
422 professional experience (2, 3, and 5 years, respectively), to compare their accuracy in  
423 answering BrainMCQ questions with that of Brainfound and GPT-4V. To evaluate the  
424 performance, we asked both Brainfound and GPT-4V to independently answer  
425 BrainMCQ three times and calculated the average accuracy. The average accuracy of  
426 Brainfound is 0.7846, the average accuracy of GPT-4V is 0.5313, the accuracy of Doctor  
427 1 is 0.5749, the accuracy of Doctor 2 is 0.5072, and the accuracy of Doctor 3 is 0.7393.  
428 Brainfound achieved the same level of accuracy as human doctors (Fig. 5a). In the time  
429 statistics for completing BrainMCQ, both Brainfound and GPT-4V finished the test  
430 within half an hour, while the three doctors took around one hour or longer (Fig. 5b).  
431 Some MCQ cases are shown in detail (Fig. 5h-i, Supplementary Fig. 36-37).

432 Besides testing on BrainMCQ, we explored the potential of using Brainfound as  
433 a specialized brain imaging AI copilot in free conversations. Brainfound is capable of  
434 accurately diagnosing disease conditions by integrating brain CT images, answering  
435 complex medical concepts, and even offering further examination suggestions for  
436 diseases currently not fully determined (Fig. 5j). During the conversation about cerebral  
437 infarction CT scans, Brainfound explained the causes of cerebral infarction and noted a  
438 hemorrhage in another area (Supplementary video 1). In the conversation about cerebral  
439 hemorrhage CT scans, Brainfound analyzed the effects of the hemorrhage on the lateral  
440 ventricles and the subarachnoid space, aiding patients in understanding their condition  
441 more comprehensively (Supplementary video 1).

442

## 443 Discussion

444 In this study, we established a comprehensive specialized multimodal model for  
445 brain medical imaging called Brainfound (Supplementary Fig. 38). We collected two

446 foundational datasets aligned with scans and reports, BrainCT-3M and BrainMRI-7M,  
447 covering common brain medical imaging modalities and disease types. Based on this, we  
448 generated the instruction dataset related to brain medical imaging, BrainInstru-1M, which  
449 includes 1,003,732 cases of brain medical imaging and corresponding instruction texts.  
450 Using the DDPM strategy, we pre-trained image encoders and decoders with text  
451 embedding enhancement via the cross-attention module as the visual module of  
452 Brainfound. Based on the RSNA dataset, we verified that Brainfound achieved the highest  
453 AUC in the intracranial hemorrhage classification task across different training data  
454 volumes. In the tasks of hemorrhage segmentation and midline shift segmentation, the  
455 pre-trained Brainfound also achieved the highest Dice coefficient across various training  
456 data volumes. For the task of automatic report generation, we created a robust human-  
457 machine evaluation system and recruited five experienced doctors from different  
458 hospitals to assess the report generation results. In comparison with current common  
459 medical report generation methods, Brainfound outperformed the second-best method by  
460 51.75% in evaluation scores. Additionally, we found that when the text encoder and  
461 image encoder are aligned, zero-shot brain medical imaging classification is possible  
462 using the input text. Brainfound achieved superior AUCs on both internal and external  
463 test datasets compared to RadImageNet. We evaluated the multimodal understanding  
464 capabilities of Brainfound through tasks requiring flexibility and a deep understanding of  
465 medical images and knowledge, like multiple-choice questions and free conversation. In  
466 the multiple-choice question task, the accuracy of Brainfound exceeded GPT-4V by  
467 47.68%, rivaling experienced human doctors. In the free conversation around brain  
468 medical imaging, Brainfound is able to correctly answer medical knowledge, diagnose  
469 diseases in images, and proactively provide subsequent diagnostic opinions or treatment  
470 plans.

471 Clinical medical AI models are inherently multimodal big data regression tasks.  
472 In the future, we plan to integrate additional modalities into Brainfound (such as EEG

473 and electronic medical records), positioning patient records as a central component of  
474 prompts to enhance the precision and complexity of disease diagnosis. By incorporating  
475 medication information, we aim to train Brainfound to automatically offer medication  
476 recommendations. We expect that with further training using extensive multimodal  
477 datasets (including medical guidelines and research papers), Brainfound will develop  
478 emergent insights related to brain medical imaging. In the high-dimensional space, brain  
479 imaging information is often fragmented and isolated; Brainfound will act as an  
480 exceptional interpolator to bridge these gaps. Brain diseases often progress over time for  
481 patients. Therefore, Brainfound needs to prioritize developing its temporal causal  
482 reasoning abilities, allowing it to deduce the disease course by integrating transformations  
483 in medical images at several time points, offering more precise prognoses and treatment  
484 strategies. On the other hand, medical AI models are responsible for doing everything  
485 possible to enhance human health in global clinical applications. By employing  
486 techniques like model distillation, quantization, pruning, and leveraging powerful cloud  
487 computing platforms, we will deploy Brainfound in the cloud. This will allow Brainfound  
488 to function as an AI copilot for clinicians working with brain medical imaging.

489

## 490 **Methods**

### 491 **Pretrain strategy of Brainfound.**

492 To establish BrainFound as an outstanding multimodal AI assistant for brain imaging  
493 analysis, our model is designed with three main components: an image encoder, an image  
494 decoder, and a large language model. We further propose a three-stage training strategy  
495 to enhance its performance. In the first stage, we adopt a diffusion model-based training  
496 approach as the pretraining strategy for the image encoder and decoder. This stage enables  
497 the model to effectively capture low-level features from medical images, which is  
498 essential for tasks such as segmentation, denoising, and modality conversion. In the  
499 second stage, we implement contrastive learning based on the pre-trained image encoder



500 and the BERT model. This stage equips the model with the capabilities of report  
501 generation and zero-shot classification. In the third stage, we fine-tune the image encoder  
502 from the second stage and the large language model InternLM<sup>66</sup> using multimodal  
503 dialogue datasets and multiple-choice question datasets. This enables the model to serve  
504 as an AI assistant capable of answering questions effectively.

505 **Self-supervised training for feature representation :** To accommodate a broader  
506 range of low-level downstream tasks, we adopted the training methodology of diffusion  
507 models as our first-stage pretraining strategy. Diffusion models are widely recognized for  
508 their ability to generate realistic images from Gaussian noise. Recent research has shown  
509 that these models can effectively capture stable prior knowledge, leading to improved  
510 performance across a variety of downstream tasks. Therefore, we leverage diffusion  
511 models as a self-supervised pretraining approach. Before training, the images were  
512 preprocessed by converting them into different window widths and window levels. The  
513 training process of diffusion models consists of two key phases: the forward diffusion  
514 process and the reverse diffusion process. During the forward diffusion phase, noise is  
515 gradually added to the data. The objective of DDPM is to train a model capable of  
516 reconstructing the original data from these noisy observations. For our training, we  
517 adhered to the standard settings<sup>67</sup>. To enhance control over the model's generated content  
518 and expand its range of applications, we adopt a cross-attention-based DDPM model. The  
519 window width, window level, and modality information of the image are used as  
520 conditional inputs to guide the learning process during generation. To improve robustness,  
521 the conditional information may be randomly dropped out during training.

522 **Contrastive Learning:** Contrastive Learning is a self-supervised learning technique that  
523 trains models on unlabeled data by learning meaningful representations through the  
524 similarities between data samples. This approach is particularly effective in scenarios  
525 with limited labeled data. By utilizing contrastive learning, the image encoder extracts  
526 features that align with semantically meaningful text in the feature space. This alignment



527 facilitates applications such as image-text retrieval and medical image captioning. In this  
528 stage, we use the encoder from the pre-trained model in the first stage to extract image  
529 features from an image sequence. These features are concatenated and then passed  
530 through an aggregation module and a projection module to generate a feature vector. This  
531 feature vector is compared with the features extracted by a text encoder to calculate  
532 similarity, and the loss is computed accordingly. For the text encoder, we employ a BERT  
533 structure fine-tuned on Chinese-language corpora. Using a rule-based report analysis  
534 method, we extract CT image categories, including normal, hemorrhage, cerebral  
535 infarction, fracture, and tumor. Since MRI scans encompass multiple distinct modality  
536 sequences, the report content is characterized by its comprehensive and summarized  
537 nature, and we leverage ChatGPT to extract key disease-related terms from the reports to  
538 ensure an accurate and comprehensive representation of disease information. When  
539 constructing the text for contrastive learning, we concatenate the extracted disease  
540 categories with the original reports.

541 **Multimodal Fine-Tuning Phase:** To enable the multimodal assistant to fully understand  
542 both images and text, we fine-tune the model using the image encoder from the  
543 contrastive learning stage and a large language model (LLM) based on the open-source  
544 LLaMA architecture. When constructing the multimodal training dataset, we utilized  
545 ChatGPT to clean and organize the report data. By designing prompts, we transformed  
546 the reports into conversational text of various styles and created multiple-choice questions.  
547 Detailed prompts are provided in the supplementary materials. Using this approach, we  
548 generated a total of  $N$  rounds of dialogue text and  $N$  sets of multiple-choice question text.  
549 Given the significant number of parameters in large models, fully fine-tuning all  
550 parameters for downstream tasks requires substantial computational resources and is  
551 prone to overfitting. Moreover, full fine-tuning can lead to severe forgetting issues,  
552 causing the model to lose many of its original capabilities. To address these challenges,  
553 we adopted the PEFT (Parameter-Efficient Fine-Tuning) method based on LoRA (Low-

554 Rank Adaptation) to fine-tune both the LLaMA language model and the image encoder  
555 model.

## 556 **Network architecture**

557 Our BrainFound framework consists of an image encoder, an image decoder, and a  
558 foundational large language model. BrainFound leverages diffusion models for  
559 pretraining to obtain robust and meaningful feature representations. During the self-  
560 supervised diffusion phase, the image encoder and image decoder are connected in a  
561 UNet-like architecture. To better capture feature representations across multiple levels,  
562 we chose a pixel-to-pixel space diffusion model instead of the Latent Diffusion Model  
563 (LDM)<sup>68</sup>. Specifically, the image encoder in BrainFound consists of five downsampling  
564 modules and one deep feature extraction module, while the image decoder comprises five  
565 upsampling modules. Each of these modules incorporates residual structures to ensure  
566 effective gradient optimization during training. Moreover, certain downsampling and  
567 upsampling blocks are enhanced with a cross-attention Transformer module. This  
568 mechanism enables the encoded textual information to directly influence the image  
569 generation process. Such textual information includes, but is not limited to, parameters  
570 like the image's window width and window level, as well as disease category information  
571 extracted from reports.

572 In the contrastive learning phase, we additionally designed an aggregation module  
573 to fuse the features of multiple images within an image sequence. The aggregation module  
574 adopts a transformer architecture consisting of two layers of transformer encoders with  
575 layer normalization. Positional encoding parameters are also included to enhance the  
576 model's ability to process sequential information.

577 During the fine-tuning phase of the multimodal assistant, we selected LLaMA as  
578 the foundation for the large language model. LLaMA is a highly optimized large-scale

579 language model based on the Transformer architecture, designed for performance and  
580 efficiency. Its core structure incorporates multi-head self-attention (MHSA) to capture  
581 long-range dependencies efficiently, enabling parallel processing of contextual  
582 relationships and maintaining semantic and syntactic consistency during generation. To  
583 enhance contextual understanding, LLaMA employs rotary position embedding (RoPE),  
584 which provides strong generalization capabilities for modeling long sequences. In this  
585 work, we utilized the 7B-parameter version of the model as a balance between  
586 performance requirements and computational resources. The pre-trained weights were  
587 sourced from InternLM. Subsequently, we adopted an instruction learning approach to  
588 fine-tune the image encoder and the LLaMA model using multimodal dialogue data and  
589 multimodal multiple-choice question datasets. Specifically, for a given dialogue, we  
590 concatenate the image-encoded features with the text-extracted tokens and input them  
591 into the LLaMA model to generate outputs. A detailed process flowchart can be found in  
592 the supplementary materials. ([Supplementary Fig. 1](#)).

### 593 **Fine-tuning Brainfound to downstream tasks.**

594 To fully unlock the potential of Brainfound across diverse tasks, we incorporated multiple  
595 state-of-the-art deep learning techniques and designed experiments tailored to various  
596 downstream applications.

597 **RSNA intracranial hemorrhage classification task:** Intracranial hemorrhage  
598 classification is essential for identifying the underlying cause of bleeding, guiding  
599 treatment decisions, and optimizing management strategies. It provides a foundation for  
600 prognosis evaluation, personalized treatment planning, and advancing medical research.  
601 In this task, we utilize an image encoder to extract image features and perform  
602 classification through an additional linear layer. Specifically, the image at  $t = 0$  is input  
603 into the image encoder to extract features, which are then passed through a dropout layer  
604 and an activation function before being fed into the linear layer for prediction. As this is  
605 a multi-label classification problem, binary cross-entropy (BCE) is employed to calculate

606 the loss. We evaluated three experimental setups on this dataset: Full-parameter fine-  
607 tuning: Both the image encoder and the linear layer parameters are updated during  
608 training. Linear-layer fine-tuning: The image encoder is frozen, and only the linear layer  
609 weights are fine-tuned. Ensemble integration: Our image encoder was incorporated into  
610 the winning ensemble strategy of the RSNA competition for further evaluation.

611 **Intracerebral hemorrhage and midline structure segmentation task:** Brainfound  
612 contains rich prior knowledge of brain medical images. To fully exploit this prior  
613 knowledge for segmentation, which is a dense prediction task, we adopted the approach<sup>69</sup>  
614 that utilized MLP to classify each pixel's label. In summary, we used the image encoder  
615 and image decoder of Brainfound to extract image features and trained an MLP classifier  
616 to classify the features extracted from each spatial location. For each image, we obtained  
617 four features at different scales from Brainfound, which were then upsampled to match  
618 the input resolution and concatenated. The feature vector corresponding to each spatial  
619 location was then fed into the MLP classifier to predict the class of that pixel, and the loss  
620 was computed with the segmentation labels to update the network. During training, we  
621 used single-center data and split it into training, validation, and testing sets. The best  
622 model was selected based on the validation set, and results were reported on the test set.  
623 The AdamW optimizer was used with a weight decay of 1e-3 and an initial learning rate  
624 of 1e-3. The training lasted for 20 epochs.

625 **MRI imaging modality translation task:** For the task of MRI modality conversion, we  
626 conducted four experiments, converting T1WI into T2WI, FLAIR, and DWI, with the  
627 latter further divided into two classes:  $b < 500$  and  $b > 500$ . For this task, we employed a  
628 straightforward conditional diffusion model to perform the modality conversion.  
629 Specifically, the input to the diffusion model consisted of both the noise channel and an  
630 additional T1WI as the condition. We acknowledge that more advanced diffusion-based  
631 mechanisms might achieve better results in this task. For our experiments, we curated a  
632 dataset of 200 cases containing these modalities. Among them, 100 cases were used for

633 training, and the remaining 100 for validation. The model was trained for 200 epochs,  
634 and the final model was evaluated on the validation set.

635 **Low-quality medical image enhancement task:** The visual module of Brainfound  
636 employs the DDPM strategy for pretraining, which provides strong representation  
637 learning capabilities for pixel-level semantic information. This capability is leveraged to  
638 develop a zero-shot denoising framework. For the detailed algorithmic process, see  
639 [Supplementary Fig. 13](#).

640 **Zeroshot classification task:** To validate the effectiveness of contrastive learning, we  
641 collected two classification datasets. The first dataset, consisting of 588 cases, was  
642 sourced from an internal center and is entirely separate from the training data used for  
643 contrastive learning. The second dataset, obtained from an external center, contains 363  
644 cases. Both datasets include five categories: normal, hemorrhage, ischemia, fracture, and  
645 tumor. For zero-shot classification, we constructed textual features for the five categories  
646 using short descriptive phrases. The cosine similarity between the textual features and the  
647 image features was then computed. After normalizing the similarity scores, softmax  
648 probabilities were calculated to predict the final category.

649 **Medical image report generation task:** During the training of contrastive learning, we  
650 additionally designed a text decoder module. This module is based on a pre-trained  
651 Chinese BERT architecture with six hidden layers and a vocabulary size of 21,128. The  
652 module takes image features as input and predicts the probability distribution of the  
653 corresponding text. The predicted results are further refined using a beam search  
654 algorithm to generate the final version of the medical image report. In this task, we  
655 compared our approach with several baseline models (RadFM, MiniGPT-Med, and GPT-  
656 4V), all of which can generate reports based on images. For RadFM and MiniGPT-Med,  
657 we utilized the prompts provided in the authors' examples to generate report outputs from

658 medical images. For GPT-4V, we designed custom prompts as input. Detailed prompts  
659 can be found in the supplementary materials. For evaluation, we adopted standard  
660 quantitative metrics such as BLEU, ROUGE-L, and METEOR. Additionally, we invited  
661 five physicians to rank the reports generated by the four methods. The evaluation criteria  
662 were designed based on physicians' suggestions and included 10 subcategories. The rank  
663 method is similar to GPA calculation, where the best items are assigned 4 points, the  
664 worst are given 1 point, and certain unacceptable cases are assigned 0 points.

665 **AI assistant assessment task:** To validate the functionality of the multimodal assistant,  
666 we designed two experiments: multiple-choice question evaluation and free-form  
667 question-answering. For the multiple-choice questions, we compared our model,  
668 BrainFound, with GPT-4o. Two physicians were invited to complete the questions as well.  
669 Both BrainFound and GPT-4o were generally able to provide consistent and well-  
670 formatted answers. However, GPT-4o occasionally failed to answer certain questions.  
671 For these cases, we repeatedly queried the API until stable responses were obtained. We  
672 compared the performance of BrainFound, GPT-4o, and the two physicians in terms of  
673 answer accuracy and response time. The detailed results are presented in Figure 5.

#### 674 **Evaluation metrics for pixel-level tasks.**

675 Several metrics are commonly used to evaluate the performance of image enhancement  
676 task. Among them, the Peak Signal-to-Noise Ratio (PSNR) is widely recognized as a  
677 standard for assessing image quality. A higher PSNR value indicates better image fidelity.  
678 If the ground truth image is  $y$ , and the raw image is  $x$ , then the definition of PSNR is as  
679 follows:

$$680 \quad PSNR = 10 \cdot \log_{10} \left( \frac{MAX^2}{MSE} \right) = 20 \cdot \log_{10} \left( \frac{MAX}{MSE} \right)$$
$$681 \quad MSE = \frac{1}{mn} \sum_{i=0}^{m-1} \sum_{j=0}^{n-1} \|x(i, j) - y(i, j)\|^2$$

682 Here  $MAX$  is the maximum pixel value. For normalized images  $MAX = 1$ .  $m$  and  $n$  are  
683 the two dimensions of the image.

684 We also compute the Signal-to-Noise Ratio (SNR) to evaluate the performance of various  
685 methods. Let  $I_{(i,j)}$  represent the raw image pixel values and  $K_{(i,j)}$  denote the model output,  
686 and the formula is as follows:

$$687 \quad SNR = 10 \cdot \log_{10} \left( \frac{\sum_{i=1}^M \sum_{j=1}^N I_{(i,j)}^2}{\sum_{i=1}^M \sum_{j=1}^N (I_{(i,j)} - K_{(i,j)})^2} \right)$$

688 Here,  $M$  and  $N$  represent the width and height of the image, respectively.

689 Root Mean Square Error (RMSE) directly quantifies the variance between two images.

690 An RMSE value approaching 0 indicates better preservation of visual information  
691 between the reconstructed image and the ground truth. RMSE is defined as follows:

$$692 \quad RMSE = \sqrt{MSE}$$

693 Structural Similarity Index (SSIM) is a widely used metric for quantifying the similarity  
694 between two images. SSIM evaluates similarity by independently comparing three key  
695 components: luminance, contrast, and structural information. These components are then  
696 weighted and combined into a single score to represent the overall similarity. The  
697 calculation of SSIM is performed using a sliding window applied across the image. In  
698 this process, a window with dimensions  $a \times a$  is selected from the image for each  
699 calculation, and the SSIM is computed for that specific window. The overall SSIM for  
700 the image is then obtained by averaging the SSIM values from all such windows after the  
701 entire image has been scanned. A higher SSIM score indicates superior image quality.

702 SSIM is defined as follows:

$$703 \quad l(x, y) = \frac{2\mu_x\mu_y + c_1}{\mu_x^2 + \mu_y^2 + c_1}$$

$$704 \quad c(x, y) = \frac{2\sigma_x\sigma_y + c_2}{\sigma_x^2 + \sigma_y^2 + c_2}$$

$$705 \quad s(x, y) = \frac{\sigma_{xy} + c_3}{\sigma_x\sigma_y + c_3}$$

$$706 \quad SSIM = l(x, y) \cdot c(x, y) \cdot s(x, y)$$

707 Here,  $\mu_x$  and  $\mu_y$  represent the mean values of  $x$  and  $y$ ;  $\sigma_x$  and  $\sigma_y$  represent the  
708 variances of  $x$  and  $y$ ,  $\sigma_{xy}$  represents the covariance between  $x$  and  $y$ .  $c_1, c_2, c_3$  are  
709 three constants.

710

### 711 **Evaluation metrics for report generation.**

712 BLEU is a widely used metric for evaluating the quality of machine-generated text,  
713 particularly in tasks such as machine translation and text summarization. The BLEU score  
714 is calculated based on n-gram precision, which measures the overlap between n-grams in  
715 the generated text and those in the reference text. BLEU-1 to BLEU-4 represent the scores  
716 computed using unigrams, bigrams, trigrams, and 4-grams, respectively, capturing  
717 different levels of linguistic context. The following is the formula:

$$718 \quad BLEU = BP \times \exp \left( \sum_{n=1}^N \omega_n \cdot \log P_n \right)$$

719  $BP$  is the brevity penalty addresses the issue of overly short translations.  $P_n$  is The  
720 precision for  $n$  grams.  $n$  ranges from 1 to 4 for BLEU-1 to BLEU-4.  $\omega_n$  is the weight  
721 assigned to each  $n$  gram precision.

722 ROUGE-L (Recall-Oriented Understudy for Gisting Evaluation - Longest Common  
723 Subsequence) is a widely used metric for evaluating the quality of machine-generated  
724 text, particularly in summarization tasks. Unlike n-gram-based metrics, ROUGE-L  
725 measures the overlap between the candidate text and reference text based on their longest  
726 common subsequence (LCS). This approach takes into account both the order and  
727 presence of words, making it well-suited for capturing fluency and relevance in text  
728 generation. The following is the formula:

$$729 \quad F_L = \frac{(1 + \beta^2) \cdot P_L \cdot R_L}{\beta^2 \cdot P_L + R_L}$$

730 where  $P_L = \frac{LCS(X,Y)}{Lenth(X)}$  is precision and  $R_L = \frac{LCS(X,Y)}{Lenth(Y)}$  is recall.  $LCS(X,Y)$  represents the  
731 length of the longest common subsequence between the candidate text  $X$  and the  
732 reference text  $Y$ . And  $\beta$  is a weighting parameter (usually set to 1) to balance the  
733 importance of precision and recall.



734 METEOR (Metric for Evaluation of Translation with Explicit ORdering) is a popular  
735 evaluation metric for machine-generated text, particularly in machine translation and text  
736 generation tasks. Unlike n-gram-based metrics such as BLEU, METEOR focuses on  
737 aligning words in the candidate and reference texts using advanced matching techniques,  
738 making it more robust and sensitive to variations in word order and synonymy. In  
739 METEOR, the precision and recall are combined into an F-score, with recall typically  
740 weighted more heavily:

$$741 \quad F_M = \frac{10 \cdot P_L \cdot R_L}{9 \cdot P_L + R_L}$$

742 Then, a penalty is applied to account for disjoint word matches, penalizing cases where  
743 matched words are far apart or unordered. The penalty is calculated as follows:

$$744 \quad Penalty = \gamma \cdot \left(\frac{ch}{m}\right)^\alpha$$

745 where  $ch$  is the number of chunks (continuous sequences of matched words),  $m$  is the  
746 total number of matches, and  $\gamma$  and  $\alpha$  are hyperparameters. The final formula is:

$$747 \quad METEOR = F_M \cdot (1 - Penalty)$$

748

## 749 **Visualization of saliency maps.**

750 The Grad-CAM<sup>72</sup> technique is harnessed to craft the Saliency Map for the input image  
751 model. Initially, the activation feature maps of the convolutional layers are derived via  
752 forward propagation, and subsequently, the gradients of these feature maps concerning  
753 the target class are computed through backpropagation. Following this, global average  
754 pooling is applied to these gradients to acquire the channel weights. These weights are  
755 then utilized to modulate the activation feature maps of the convolutional layers,  
756 culminating in a two-dimensional heat map of weighted summation, elucidating the  
757 significance of distinct regions within the input image for the target category. Following  
758 this, the heat map undergoes upscaling to match the input image's dimensions using  
759 bilinear interpolation. Lastly, the heat map is rendered visually through color mapping to

760 exhibit the areas of interest identified by the model. The contour map delineates lines of  
761 uniform value within a saliency map.

762

### 763 **Data availability**

764 All relevant data that support the findings of this study are available from the  
765 corresponding authors upon reasonable request.

766

### 767 **Code availability**

768 Our Brainfound can be found at <https://github.com/gingerbread000/Brainfound>.

769

### 770 **Acknowledgments**

771 This work was supported by NSFC (No. 62088102, 62222508, 62071272, 82327803,  
772 82441014, and 82202133) and MOST(No.2020AA0105500).

773

### 774 **Author contributions**

775 Q.D., X.L., and Y.G. conceived the Brainfound project and revised the manuscript. G.Z.  
776 and Z.G. implemented the Brainfound framework, trained the multimodality model,  
777 completed the fine-tuning of downstream tasks, organized the experimental results, and  
778 composed the manuscript. C. D. collected data and established the BrainCT-3M and  
779 BrainMRI-7M datasets. J.L. completed the saliency visualization of Brainfound attention.  
780 T.W., Y.G., and Y.C. established the BrainInstru-1M instruction dataset. L. W. collected  
781 5T MRI brain data. Y. L., Y. L., Q. C., K. F., and L. W. completed the human-machine  
782 evaluation of automatic report generation. Q. C., K. F., and Y. L. Q. C., L. W., and Y. L.  
783 completed the answering of BrainMCQ.

784

### 785 **Competing financial interests**

786 The authors declare no competing financial interests.

787

## 788 **References**

- 789 1. Wang, J. *et al.* Self-improving generative foundation model for synthetic medical  
790 image generation and clinical applications. *Nature Medicine* 1–9 (2024).
- 791 2. Pai, S. *et al.* Foundation model for cancer imaging biomarkers. *Nat Mach Intell* **6**,  
792 354–367 (2024).
- 793 3. Hamed, A. A. *et al.* Gliomagenesis mimics an injury response orchestrated by neural  
794 crest-like cells. *Nature* 1–11 (2025).
- 795 4. Sun, Y., Wang, L., Li, G., Lin, W. & Wang, L. A foundation model for enhancing  
796 magnetic resonance images and downstream segmentation, registration and  
797 diagnostic tasks. *Nature Biomedical Engineering* 1–18 (2024).
- 798 5. Lu, M. Y. A Multimodal Generative AI Copilot for Human Pathology.
- 799 6. Huang, Z., Bianchi, F., Yuksekogonul, M., Montine, T. J. & Zou, J. A visual–language  
800 foundation model for pathology image analysis using medical Twitter. *Nat Med* **29**,  
801 2307–2316 (2023).
- 802 7. Li, C. *et al.* Llava-med: Training a large language-and-vision assistant for  
803 biomedicine in one day. *Advances in Neural Information Processing Systems* **36**,  
804 (2024).
- 805 8. Baid, U. *et al.* The RSNA-ASNR-MICCAI BraTS 2021 Benchmark on Brain Tumor  
806 Segmentation and Radiogenomic Classification. Preprint at  
807 <http://arxiv.org/abs/2107.02314> (2021).
- 808 9. Busch, E. L. *et al.* Multi-view manifold learning of human brain-state trajectories.  
809 *Nat Comput Sci* **3**, 240–253 (2023).
- 810 10. Iqbal, A., Khan, R. & Karayannis, T. Developing a brain atlas through deep  
811 learning. *Nature Machine Intelligence* **1**, 277–287 (2019).

- 812 11. Handwerker, J. *et al.* A CMOS NMR needle for probing brain physiology with  
813 high spatial and temporal resolution. *Nat Methods* (2019) doi:10.1038/s41592-019-  
814 0640-3.
- 815 12. Cheng, J. *et al.* Brain Age Estimation From MRI Using Cascade Networks With  
816 Ranking Loss. *IEEE Trans. Med. Imaging* **40**, 3400–3412 (2021).
- 817 13. Lyu, Q. & Wang, G. Conversion Between CT and MRI Images Using Diffusion  
818 and Score-Matching Models. Preprint at <http://arxiv.org/abs/2209.12104> (2022).
- 819 14. Bercea, C. I., Wiestler, B., Rueckert, D. & Albarqouni, S. Federated  
820 disentangled representation learning for unsupervised brain anomaly detection.  
821 *Nature Machine Intelligence* **4**, 685–695 (2022).
- 822 15. He, S., Grant, P. E. & Ou, Y. Global-Local Transformer for Brain Age  
823 Estimation. *IEEE Trans. Med. Imaging* **41**, 213–224 (2022).
- 824 16. Hollon, T. C. *et al.* Near real-time intraoperative brain tumor diagnosis using  
825 stimulated Raman histology and deep neural networks. *Nat Med* **26**, 52–58 (2020).
- 826 17. Menze, B. H. *et al.* The multimodal brain tumor image segmentation benchmark  
827 (BRATS). *IEEE transactions on medical imaging* **34**, 1993–2024 (2014).
- 828 18. Hoopes A., Mora J. S., Dalca A. V., Fischl B. & Hoffmann M. SynthStrip: skull-  
829 stripping for any brain image. *NeuroImage* **260**, 119474 (2022).
- 830 19. Ji, M. *et al.* Detection of human brain tumor infiltration with quantitative  
831 stimulated Raman scattering microscopy. *Sci. Transl. Med.* **7**, 309ra163-309ra163  
832 (2015).
- 833 20. Guo, Y. *et al.* Deep learning with weak annotation from diagnosis reports for  
834 detection of multiple head disorders: a prospective, multicentre study. *The Lancet*  
835 *Digital Health* **4**, e584–e593 (2022).

- 836 21. Moguilner, S. *et al.* Brain clocks capture diversity and disparities in aging and  
837 dementia across geographically diverse populations. *Nature medicine* 1–12 (2024).
- 838 22. He, Z. *et al.* A deep unrolled neural network for real-time MRI-guided brain  
839 intervention. *Nat Commun* **14**, 8257 (2023).
- 840 23. Khalighi, S. *et al.* Artificial intelligence in neuro-oncology: advances and  
841 challenges in brain tumor diagnosis, prognosis, and precision treatment. *NPJ*  
842 *Precision Oncology* **8**, 80 (2024).
- 843 24. Chen, E., Prakash, S., Janapa Reddi, V., Kim, D. & Rajpurkar, P. A framework  
844 for integrating artificial intelligence for clinical care with continuous therapeutic  
845 monitoring. *Nature Biomedical Engineering* 1–10 (2023).
- 846 25. Lee, E.-J., Kim, Y.-H., Kim, N. & Kang, D.-W. Deep into the brain: artificial  
847 intelligence in stroke imaging. *Journal of stroke* **19**, 277 (2017).
- 848 26. He, Y. *et al.* Disorder-Free Data Are All You Need—Inverse Supervised  
849 Learning for Broad-Spectrum Head Disorder Detection. *NEJM AI* **1**, AIoa2300137  
850 (2024).
- 851 27. Campanella, G. *et al.* Clinical-grade computational pathology using weakly  
852 supervised deep learning on whole slide images. *Nat Med* **25**, 1301–1309 (2019).
- 853 28. Zhou, Y. *et al.* A foundation model for generalizable disease detection from  
854 retinal images. *Nature* **622**, 156–163 (2023).
- 855 29. Biderman, D. *et al.* Lightning Pose: improved animal pose estimation via semi-  
856 supervised learning, Bayesian ensembling and cloud-native open-source tools. *Nat*  
857 *Methods* **21**, 1316–1328 (2024).
- 858 30. Chen, C. *et al.* MotionTransformer: Transferring Neural Inertial Tracking  
859 between Domains. *AAAI* **33**, 8009–8016 (2019).

- 860 31. Ye, S., Lauer, J., Zhou, M., Mathis, A. & Mathis, M. W. AmadeusGPT: a  
861 natural language interface for interactive animal behavioral analysis.
- 862 32. Radford, A., Narasimhan, K., Salimans, T. & Sutskever, I. Improving Language  
863 Understanding by Generative Pre-Training.
- 864 33. Ramesh, A., Dhariwal, P., Nichol, A., Chu, C. & Chen, M. Hierarchical Text-  
865 Conditional Image Generation with CLIP Latents. Preprint at  
866 <http://arxiv.org/abs/2204.06125> (2022).
- 867 34. Chen, T., Kornblith, S., Norouzi, M. & Hinton, G. A simple framework for  
868 contrastive learning of visual representations. in *International conference on machine*  
869 *learning* 1597–1607 (PMLR, 2020).
- 870 35. Zhang, H. *et al.* DINO: DETR with Improved DeNoising Anchor Boxes for  
871 End-to-End Object Detection. Preprint at <http://arxiv.org/abs/2203.03605> (2022).
- 872 36. Chen, R. J. *et al.* Towards a general-purpose foundation model for  
873 computational pathology. *Nat Med* **30**, 850–862 (2024).
- 874 37. Qiu, J. *et al.* Development and validation of a multimodal multitask vision  
875 foundation model for generalist ophthalmic artificial intelligence. *NEJM AI* **1**,  
876 AIoa2300221 (2024).
- 877 38. Vermeulen, C. *et al.* Ultra-fast deep-learned CNS tumour classification during  
878 surgery. *Nature* **622**, 842–849 (2023).
- 879 39. Xiong, Z. *et al.* How Generalizable Are Foundation Models When Applied to  
880 Different Demographic Groups and Settings? *NEJM AI* AIcs2400497 (2024).
- 881 40. Chen, R. J. *et al.* Towards a general-purpose foundation model for  
882 computational pathology. *Nat Med* **30**, 850–862 (2024).

- 883 41. Dubey, A. *et al.* The llama 3 herd of models. *arXiv preprint arXiv:2407.21783*  
884 (2024).
- 885 42. Flanders, A. E. *et al.* Construction of a machine learning dataset through  
886 collaboration: the RSNA 2019 brain CT hemorrhage challenge. *Radiology: Artificial*  
887 *Intelligence* **2**, e190211 (2020).
- 888 43. Vaswani, A. *et al.* Attention Is All You Need. Preprint at  
889 <http://arxiv.org/abs/1706.03762> (2023).
- 890 44. Bao, H., Dong, L., Piao, S. & Wei, F. BEiT: BERT Pre-Training of Image  
891 Transformers. Preprint at <http://arxiv.org/abs/2106.08254> (2022).
- 892 45. Ho, J., Jain, A. & Abbeel, P. Denoising Diffusion Probabilistic Models. Preprint  
893 at <http://arxiv.org/abs/2006.11239> (2020).
- 894 46. Hu, E. J. *et al.* LoRA: Low-Rank Adaptation of Large Language Models.  
895 Preprint at <http://arxiv.org/abs/2106.09685> (2021).
- 896 47. Bai, Y. *et al.* Masked Autoencoders Enable Efficient Knowledge Distillers.
- 897 48. Mei, X. *et al.* RadImageNet: An Open Radiologic Deep Learning Research  
898 Dataset for Effective Transfer Learning. *Radiology: Artificial Intelligence* **4**, e210315  
899 (2022).
- 900 49. He, K., Zhang, X., Ren, S. & Sun, J. Deep residual learning for image  
901 recognition. in *Proceedings of the IEEE conference on computer vision and pattern*  
902 *recognition* 770–778 (2016).
- 903 50. Huang, G., Liu, Z., Van Der Maaten, L. & Weinberger, K. Q. Densely  
904 connected convolutional networks. in *Proceedings of the IEEE conference on*  
905 *computer vision and pattern recognition* 4700–4708 (2017).

- 906 51. Ma, J. & Wang, B. Segment Anything in Medical Images. Preprint at  
907 <http://arxiv.org/abs/2304.12306> (2023).
- 908 52. Wang, W. *et al.* InternImage: Exploring Large-Scale Vision Foundation Models  
909 with Deformable Convolutions. in *2023 IEEE/CVF Conference on Computer Vision*  
910 *and Pattern Recognition (CVPR)* 14408–14419 (IEEE, Vancouver, BC, Canada,  
911 2023). doi:10.1109/CVPR52729.2023.01385.
- 912 53. Zhao, Y. *et al.* Whole-body magnetic resonance imaging at 0.05 Tesla. *Science*  
913 **384**, eadm7168 (2024).
- 914 54. Liu, Y. *et al.* A low-cost and shielding-free ultra-low-field brain MRI scanner.  
915 *Nat Commun* **12**, 7238 (2021).
- 916 55. Kimberly, W. T. *et al.* Brain imaging with portable low-field MRI. *Nat Rev*  
917 *Bioeng* **1**, 617–630 (2023).
- 918 56. Wei, Z. *et al.* 5T magnetic resonance imaging: radio frequency hardware and  
919 initial brain imaging. *Quant Imaging Med Surg* **13**, 3222–3240 (2023).
- 920 57. Zhang, K. *et al.* Practical Blind Image Denoising via Swin-Conv-UNet and Data  
921 Synthesis. *Mach. Intell. Res.* **20**, 822–836 (2023).
- 922 58. Huang, T., Li, S., Jia, X., Lu, H. & Liu, J. Neighbor2Neighbor: Self-Supervised  
923 Denoising from Single Noisy Images. in *2021 IEEE/CVF Conference on Computer*  
924 *Vision and Pattern Recognition (CVPR)* 14776–14785 (IEEE, Nashville, TN, USA,  
925 2021). doi:10.1109/CVPR46437.2021.01454.
- 926 59. Batson, J. & Royer, L. Noise2Self: Blind Denoising by Self-Supervision.  
927 Preprint at <https://doi.org/10.48550/arXiv.1901.11365> (2019).



- 928 60. Goel, H., Narasimhan, S. S., Akcin, O. & Chinchali, S. SynDiff-AD: Improving  
929 Semantic Segmentation and End-to-End Autonomous Driving with Synthetic Data  
930 from Latent Diffusion Models. *arXiv preprint arXiv:2411.16776* (2024).
- 931 61. Dalmaz, O., Yurt, M. & Çukur, T. ResViT: residual vision transformers for  
932 multimodal medical image synthesis. *IEEE Transactions on Medical Imaging* **41**,  
933 2598–2614 (2022).
- 934 62. Zhang, Y. *et al.* PGAN: Part-based nondirect coupling embedded GAN for  
935 person reidentification. *IEEE MultiMedia* **27**, 23–33 (2020).
- 936 63. Deng, J. *et al.* cGAN based facial expression recognition for human-robot  
937 interaction. *IEEE Access* **7**, 9848–9859 (2019).
- 938 64. Wu, C., Zhang, X., Zhang, Y., Wang, Y. & Xie, W. Towards generalist  
939 foundation model for radiology. *arXiv preprint arXiv:2308.02463* (2023).
- 940 65. Alkhaldi, A. *et al.* Minigpt-med: Large language model as a general interface for  
941 radiology diagnosis. *arXiv preprint arXiv:2407.04106* (2024).
- 942 66. Team, I. Internlm: A multilingual language model with progressively enhanced  
943 capabilities. 2023-01-06)[2023-09-27]. <https://github.com/InternLM/InternLM>  
944 (2023).
- 945 67. Chen, S., Sun, P., Song, Y. & Luo, P. DiffusionDet: Diffusion Model for Object  
946 Detection. Preprint at <http://arxiv.org/abs/2211.09788> (2022).
- 947 68. Magalhães, F. High-resolution hyperspectral single-pixel imaging system based  
948 on compressive sensing. *Opt. Eng* **51**, 071406 (2012).
- 949 69. Baranchuk, D., Rubachev, I., Voynov, A., Khrukov, V. & Babenko, A. Label-  
950 efficient semantic segmentation with diffusion models. *arXiv preprint*  
951 *arXiv:2112.03126* (2021).

- 952 70. Lyu, J. *et al.* Generative adversarial network–based noncontrast CT angiography  
953 for aorta and carotid arteries. *Radiology* **309**, e230681 (2023).
- 954 71. Isola, P., Zhu, J.-Y., Zhou, T. & Efros, A. A. Image-to-image translation with  
955 conditional adversarial networks. in *Proceedings of the IEEE conference on*  
956 *computer vision and pattern recognition* 1125–1134 (2017).
- 957 72. Selvaraju, R. R. *et al.* Grad-cam: Visual explanations from deep networks via  
958 gradient-based localization. in *Proceedings of the IEEE international conference on*  
959 *computer vision* 618–626 (2017).
- 960  
961



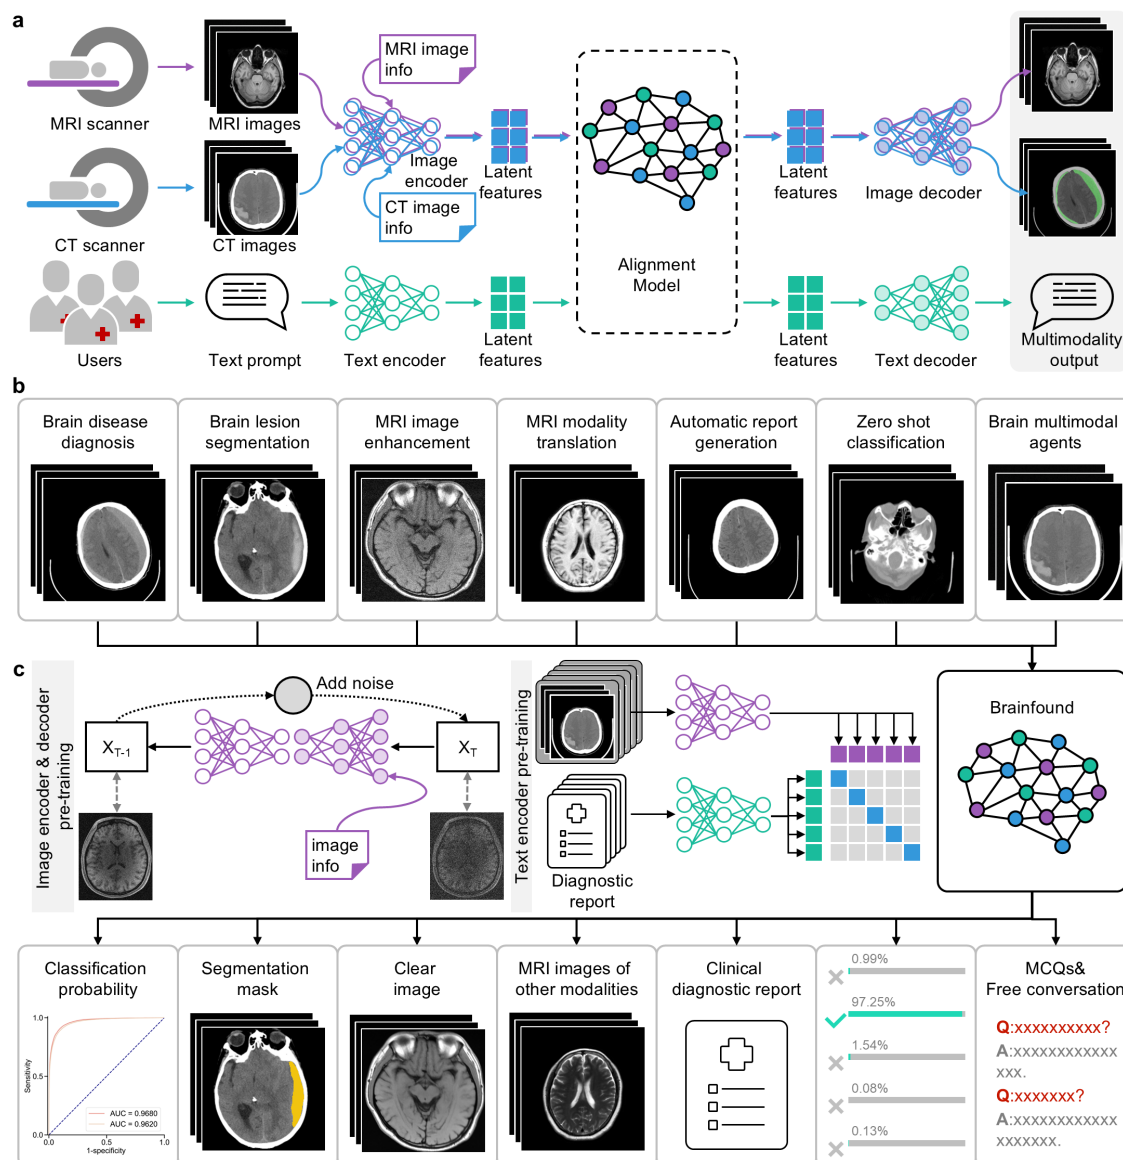

963 **Fig. 1 | Overview of Brainfound.** **a**, Brainfound aims to develop an AI medical copilot  
 964 capable of processing brain CT or MRI scan sequences and user instructions as inputs  
 965 and delivering either processed images or textual outputs. CT or MRI image sequences  
 966 and the basic information of the images are encoded by the image encoder to obtain latent  
 967 space features, which are aligned with the features produced by the text encoder in the  
 968 alignment model. Then, the alignment model is connected to two decoders to obtain the  
 969 output of Brainfound. **b**, Downstream task evaluation for Brainfound. As an AI medical  
 970 copilot, Brainfound excels in several downstream tasks, including brain disease diagnosis,  
 971 brain lesion segmentation, MRI image enhancement, MRI cross-modality translation,  
 972 automatic generation of reports from images, zero-shot brain disease classification, and  
 973 free human-AI conversation. These tasks include all tasks related to brain medical

974 imaging, from single-modality pixel-level tasks to multi-modality diagnostic-related  
975 conversations. **c**, Stepwise and modular pre-training strategy for Brainfound. The image  
976 encoder and decoder of Brainfound undergo pre-training through the DDPM strategy on  
977 the BrainCT-3M and BrainMRI-7M, with fundamental information like image modality  
978 randomly masked and then input into the image encoder and decoder. The text encoder  
979 is pre-trained using the CLIP strategy, aligning paired diagnostic reports and image  
980 sequences in the latent feature space.  
981

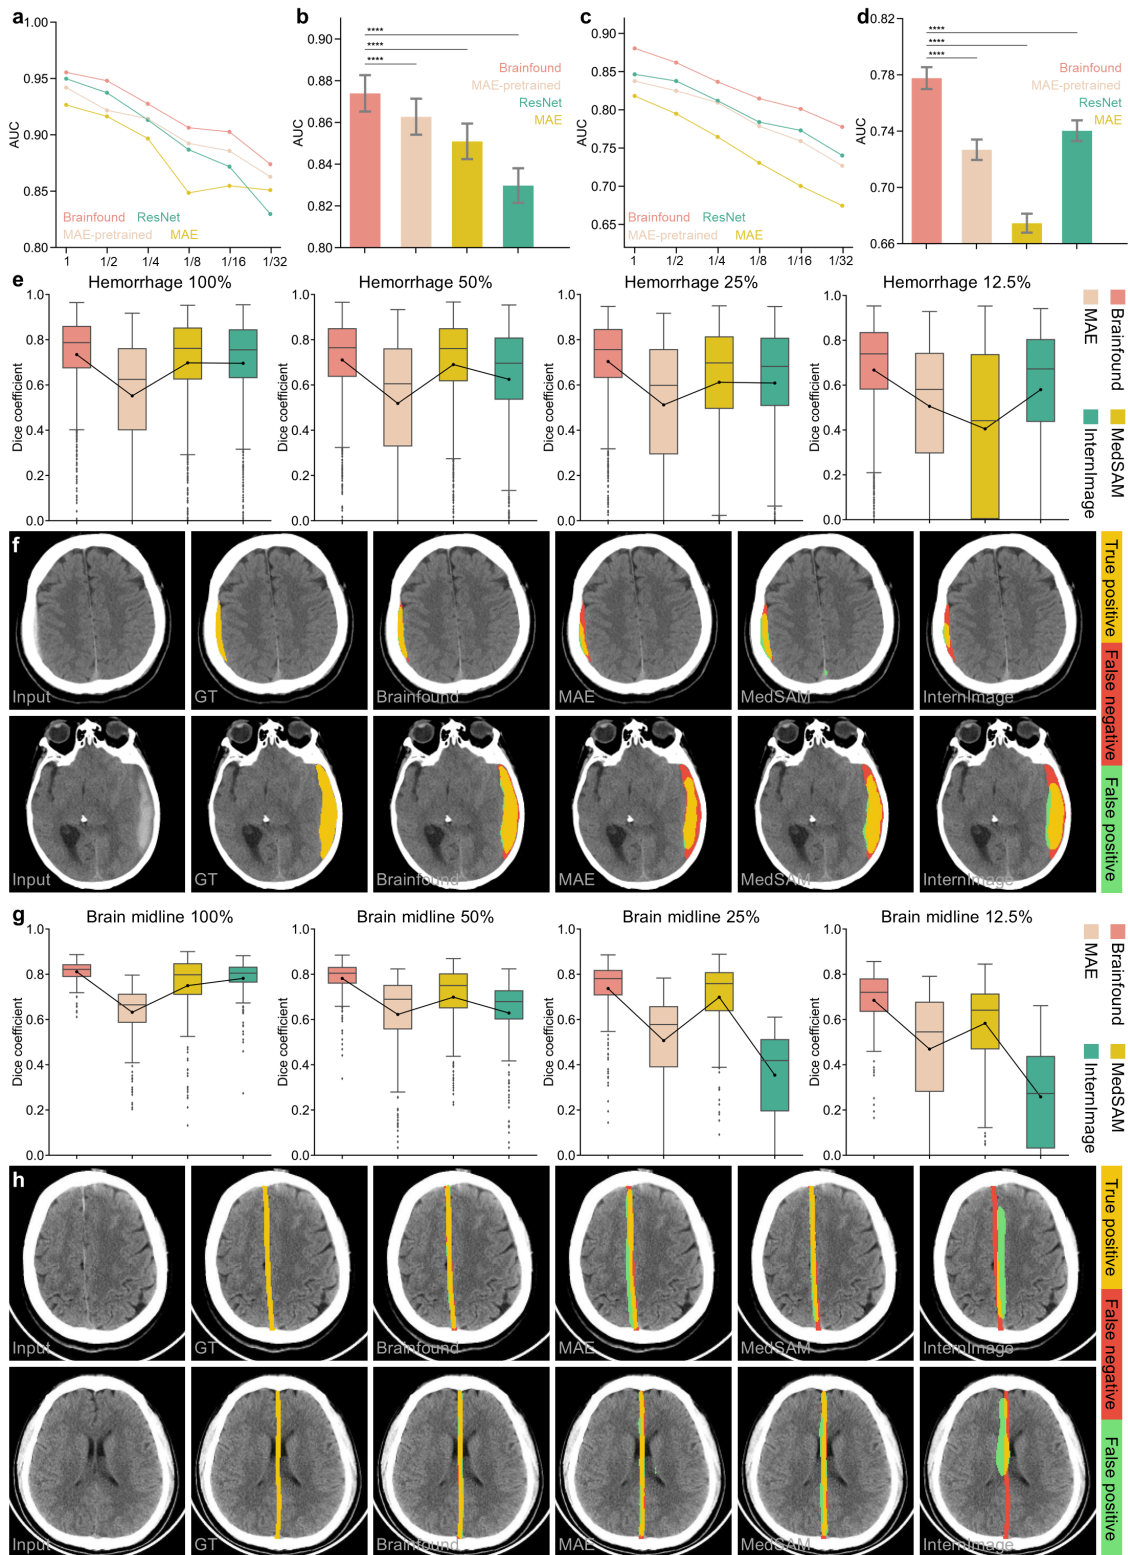

982 **Fig. 2 | Performance of Brainfound in diagnosing and localizing brain diseases a,**  
 983 **The AUC results for four methods in full parameter fine-tuning for brain hemorrhage**  
 984 **classification. "1" denotes fine-tuning using the complete training set (110,000 training**

985 images), "1/2" signifies using half of the dataset, and so forth. The four methods include  
986 Brainfound, ResNet, MAE-pretrained, and MAE. **b**, The AUC results for the four  
987 methods using 1/32 of the training set for full parameter fine-tuning in brain hemorrhage  
988 classification. **c**, The AUC results for four methods when only the final MLP is fine-tuned  
989 for brain hemorrhage classification. The four networks serve as feature extractors, with  
990 parameters frozen during fine-tuning. **d**, The AUC results for four methods using 1/32 of  
991 the training set with only the final MLP fine-tuned for brain hemorrhage classification. **e**,  
992 Comparing the accuracy of four methods with full parameter fine-tuning on brain  
993 hemorrhage segmentation using different training set sizes. "100%" indicates using the  
994 entire training set (220 brain CT scans) to fine-tune the four methods. The four methods  
995 are Brainfound, MedSAM, MAE, and InternImage. **f**, Two cases of brain hemorrhage  
996 segmentation. From left to right are the original CT image, ground truth, and  
997 segmentation results from Brainfound, MedSAM, MAE, and InternImage. **g**, The  
998 accuracy comparison of four approaches with full parameter fine-tuning for midline brain  
999 segmentation across varying training set sizes. "100%" denotes using the complete  
1000 training set (439 images) for fine-tuning. The methods compared include Brainfound,  
1001 MedSAM, MAE, and InternImage. **h**, Two cases of midline brain segmentation. From  
1002 left to right are the original CT image, ground truth, and segmentation results by  
1003 Brainfound, MedSAM, MAE, and InternImage.

1004



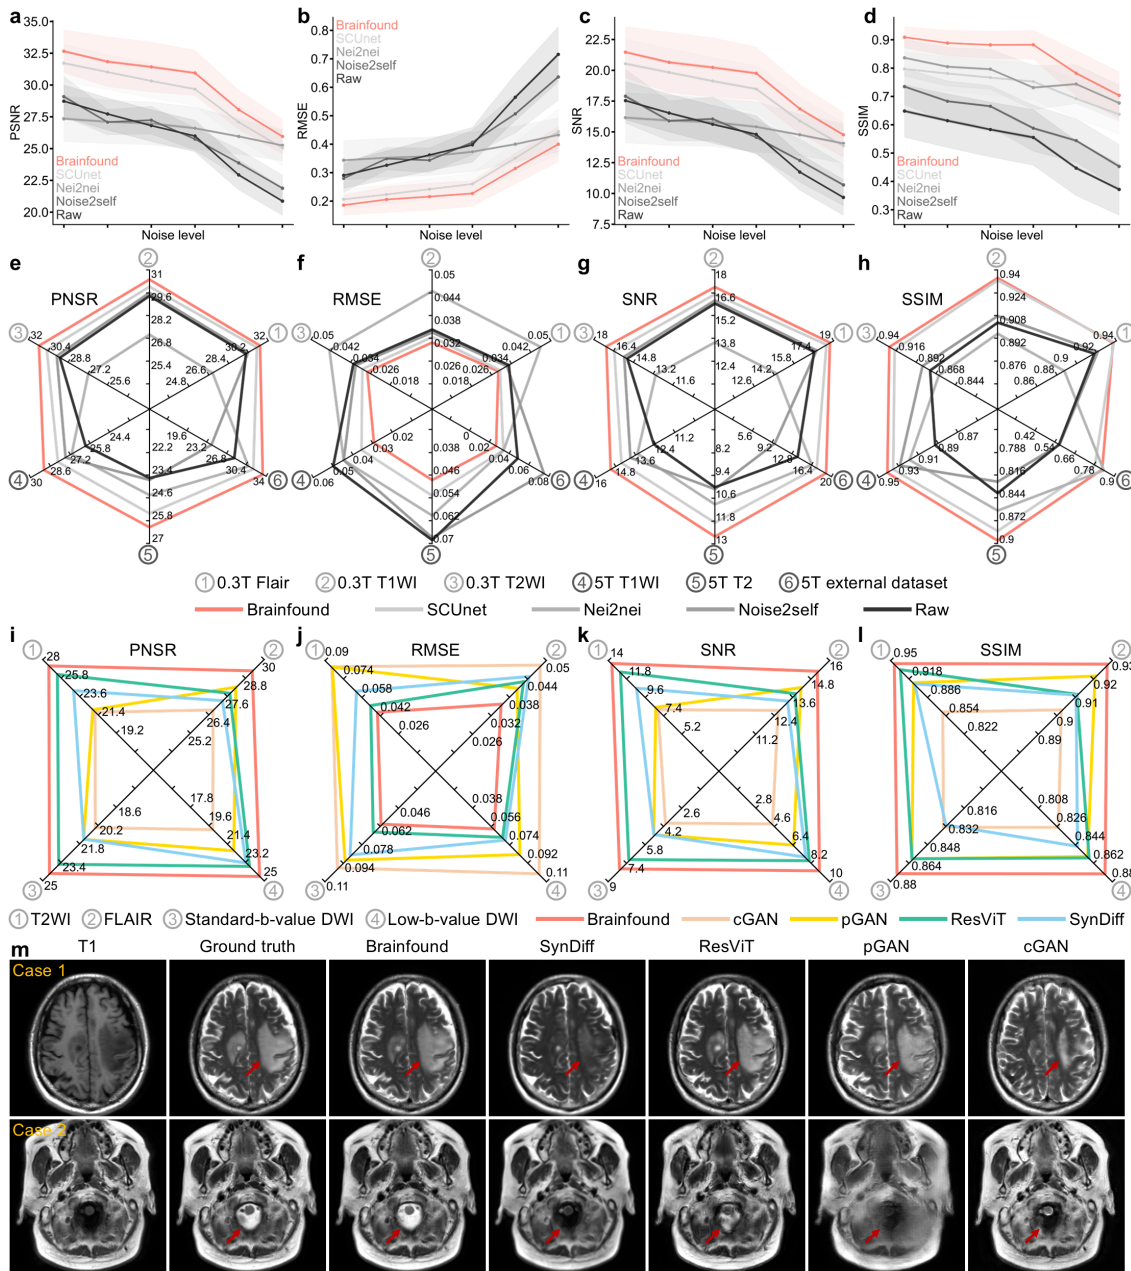

1005 **Fig. 3 | Estimation of Brainfounded in MRI image enhancement and cross-modality**  
 1006 **translation.** **a-d**, The zero-shot learning denoising performance of four methods was  
 1007 quantitatively assessed on the simulated dataset. PSNR, RMSE, SNR, and SSIM were  
 1008 calculated on the test dataset(n=1380). Simulated datasets with six different noise levels  
 1009 were employed to evaluate the image enhancement capabilities of the four methods.  
 1010 Different colored curves indicate the results of different methods. Brainfounded consistently  
 1011 achieved superior denoising effects across all noise conditions. **e-f**, High SNR, and low  
 1012 SNR images were collected from the low-field MRI (0.3 T) and the ultra-high-field MRI

1013 (5 T) to validate the zero-shot learning denoising performance of four methods. The test  
1014 set comprises 0.3 T FLAIR scans(n=450), 0.3 T T1WI scans(n=450), 0.3 T T2WI scans  
1015 (n=450), 5 T T1WI scans(n=19), 5 T T2WI scans (n=10), and 5 T external test set (n=25).  
1016 PSNR, RMSE, SNR, and SSIM were calculated on six real-world test datasets. Each radar  
1017 chart represents the results of one metric. Different colored curves illustrate the denoising  
1018 results of each method. Brainfound achieved the best scores on almost all metrics. **i-l**,  
1019 Assessment of the cross-modality translation capability of five methods on clinically  
1020 common sequences. The original sequence modality is T1WI, while the conversion target  
1021 sequences include T2WI, FLAIR, low-b-value DWI, and standard-b-value DWI. The  
1022 training set comprises 94 head 3T MRI scans (2205 images), and the test set includes 88  
1023 head 3T MRI scans (1936 images). Each radar chart represents the results of one metric.  
1024 Different colored curves indicate the modality translation results of each method.  
1025 Brainfound achieved the best scores on all metrics. **m**, two cases of T1WI to T2WI  
1026 modality translation. In case 1, the lesion indicated by the red arrow is translated more  
1027 accurately in the result of Brainfound. In case 2, the structures within the foramen  
1028 magnum (indicated by the red arrow) are demonstrated in the result of Brainfound, with  
1029 cerebrospinal fluid exhibiting high signal intensity, presenting distinct contrast against  
1030 the skull, medulla oblongata, and vertebral arteries.  
1031

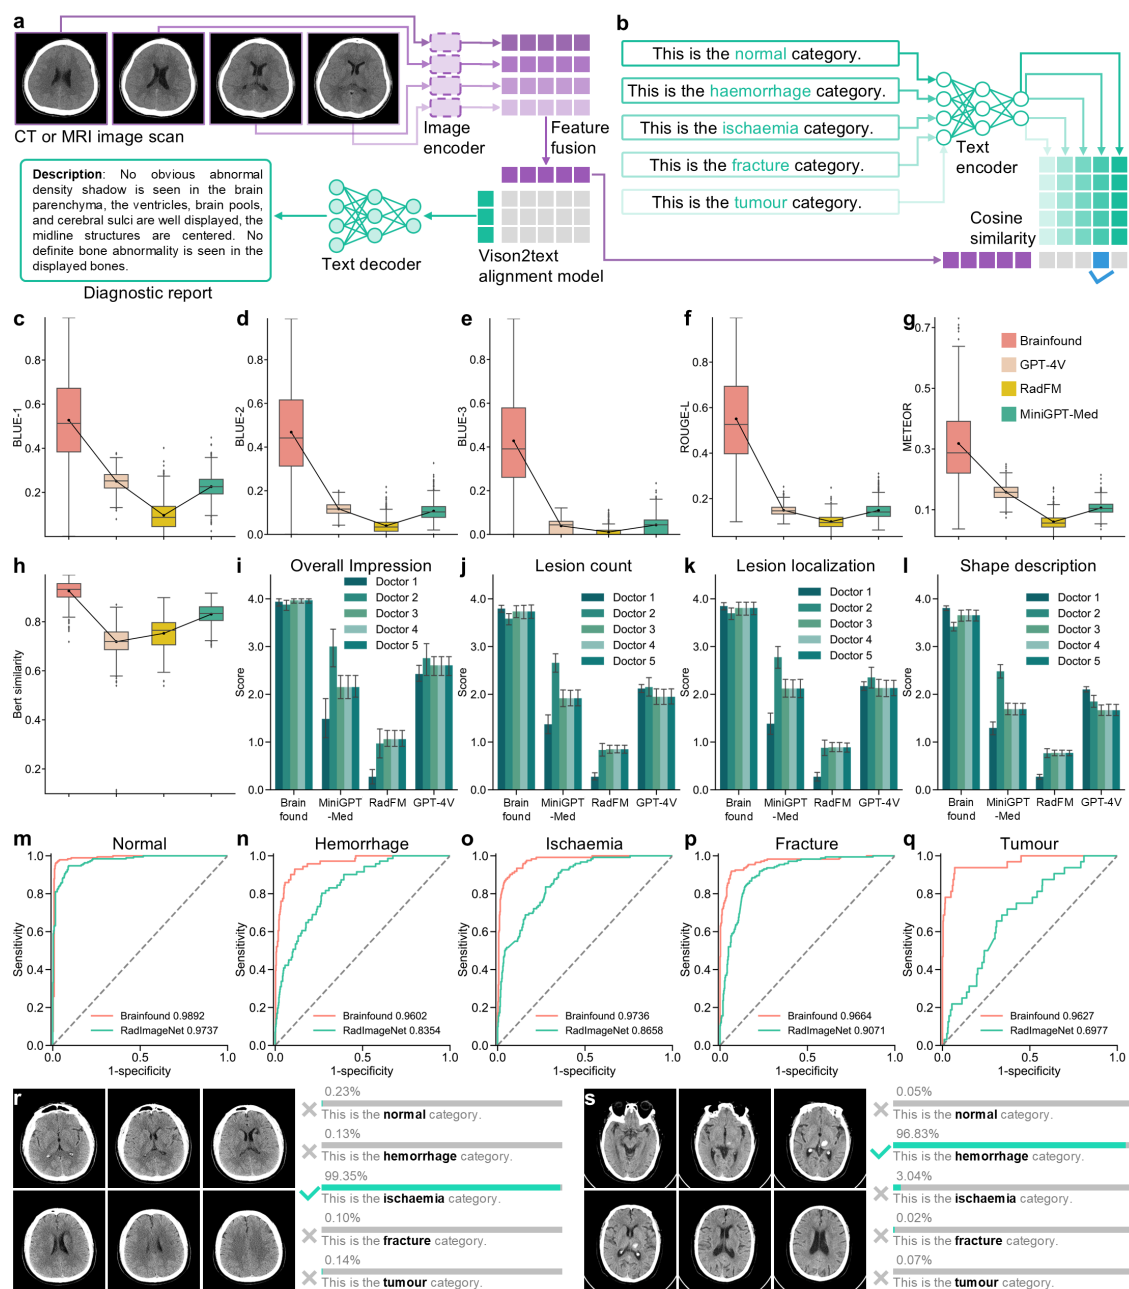

1032 **Fig. 4 | Assessment of Brainfound in automatic report generation.** **a**, The image  
 1033 encoder extracts features from CT or MRI image sequences, producing latent space  
 1034 features. Diagnostic reports are processed through the text encoder to acquire latent space  
 1035 features. The features of both the image sequences and their corresponding diagnostic  
 1036 reports are aligned in the latent space of Brainfound. **b**, The alignment model of  
 1037 Brainfound serves directly as a zero-shot classification model. Brainfound can be  
 1038 instructed in natural language to perform brain medical imaging classification. **c-h**,  
 1039 Quantitative comparison of the report generation outcomes for Brainfound, GPT-4V,  
 1040 RadFM, and MiniGPT-Med (n=990). The metrics used for comparison include BLUE-1,

1041 BLUE-2, BLUE-3, ROUGE-L, METEOR, and Bert similarity. The higher the scores, the  
1042 closer the generated reports are to the ground truth reports and the greater the accuracy.  
1043 **i-l**, Under clinical standards, the reports generated by four models were evaluated by five  
1044 experienced doctors (n=33). The scoring criteria include overall assessment, number of  
1045 lesions, location of lesions, and description of lesion shapes. More scoring results can be  
1046 found in [Supplementary Fig. 30](#). **m-q**, The zero-shot classification results of Brainfound,  
1047 with RadImageNet as the comparison method. The AUC curves, arranged from left to  
1048 right, correspond to normal, hemorrhage, ischemia, fracture, and tumor categories. **r**,  
1049 Classification output probabilities for ischemia type. **s**, Classification output probabilities  
1050 for hemorrhage type.  
1051

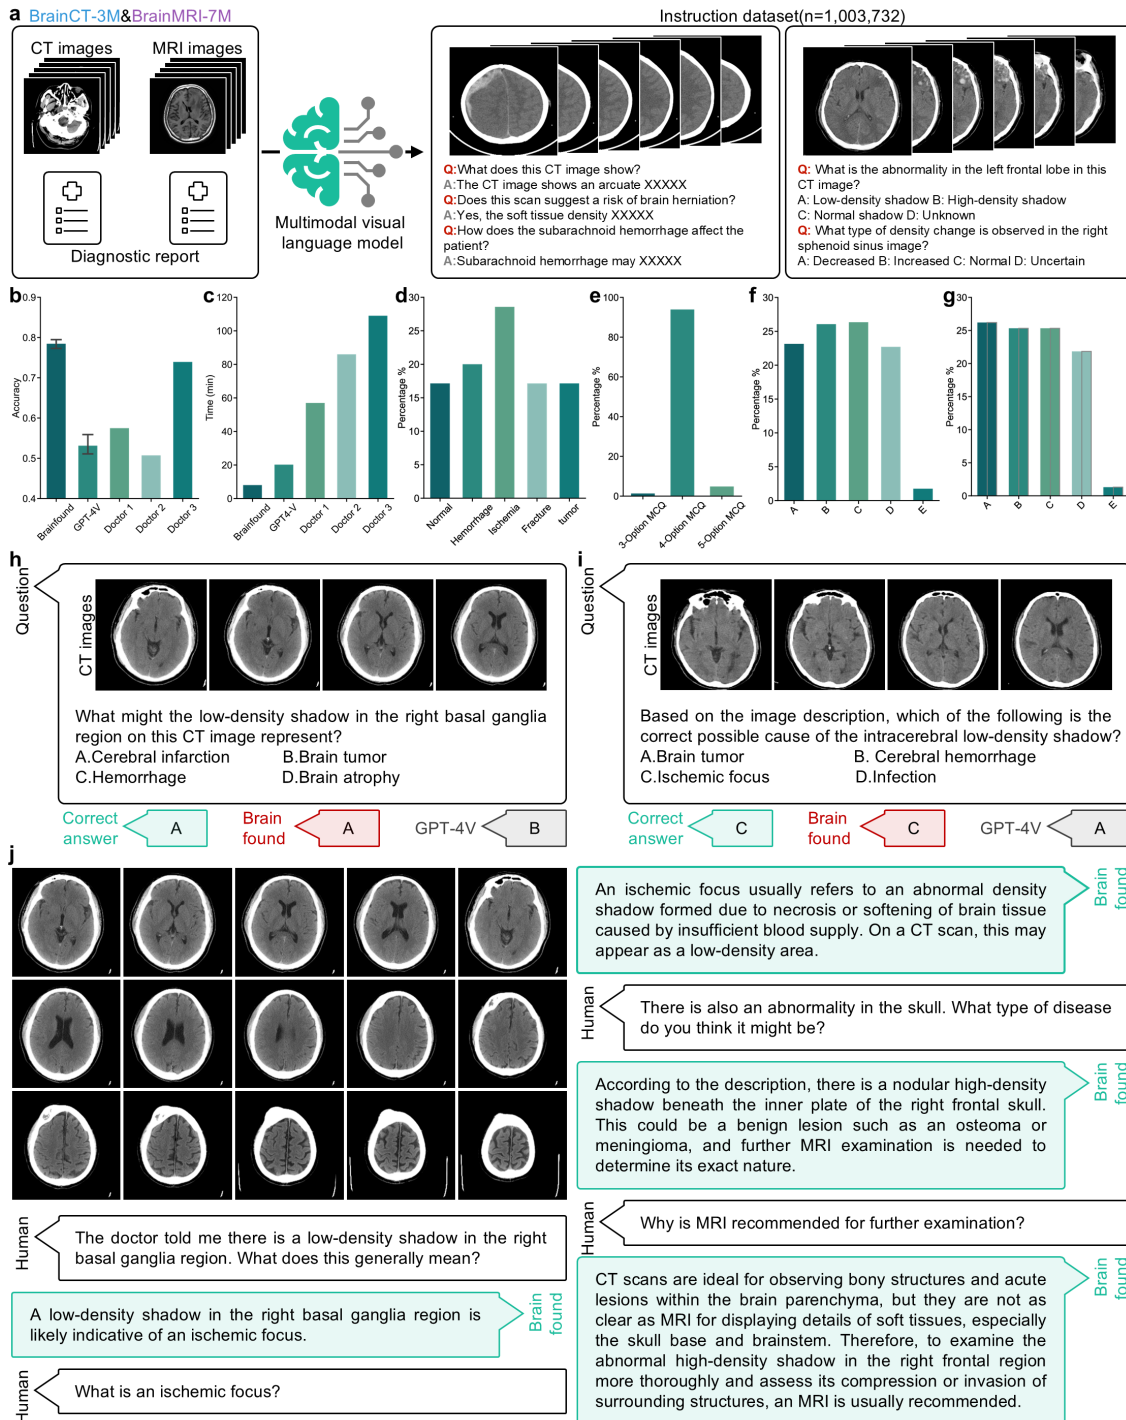

1052 **Fig. 5 | Evaluation of Brainfound on multiple-choice questions and free**  
 1053 **conversations.** **a**, Leveraging the advanced capabilities of GPT-4, a multimodal brain  
 1054 imaging dataset comprising 1,003,732 instructions and corresponding responses has been  
 1055 constructed. Every scan sequence and its paired report from BrainCT-3M and BrainMRI-  
 1056 7M are utilized to generate MCQs and multi-turn conversations on various aspects. **b**,  
 1057 The response accuracy of Brainfound, GPT-4V, and two proficient doctors on BrainMCQ.

1058 Both Brainfound and GPT4-V underwent evaluation three times. Error bars represent the  
1059 95% confidence interval. **c**, The time taken by Brainfound, GPT-4V, and two skilled  
1060 doctors to complete BrainMCQ. The average time for three evaluations by Brainfound  
1061 and GPT-4V is displayed. **d**, The percentage of questions related to normal, cerebral  
1062 hemorrhage, cerebral ischemia, brain tumor, and fracture types in BrainMCQ. **e**, The  
1063 proportion of three-option, four-option, and five-option multiple-choice questions in  
1064 BrainMCQ. **f**, The proportion of each option in the correct answers of BrainMCQ. **g**, The  
1065 proportion of each option in the answers of Brainfound and GPT-4V. **h-i**, Two cases of  
1066 Brainfound and GPT-4V answering MCQs. Brain CT sequences and questions are fed  
1067 into the models, which subsequently provide the chosen answers. **j**, A case of Brainfound  
1068 in the free conversation. Brain CT image sequences serve as input for Brainfound,  
1069 allowing humans to engage in multiple rounds of conversation based on the image  
1070 information.

1071

1072
